# Supplementary material
Source: publisher figshare collection journal article supplement (https://sage.figshare.com/ndownloader/files/14230424)
Supplement: Supplementary file 1 [file 14230424]

## Sheet: Kramptjärnen
Info					Majors								Minors																			lake-water conc.	sediment conc.		Diatoms
CE	(cm, mid-sample)				(%)	(%)	(%)	(%)	(%)	(%)	(%)	(%)	(ppm)	(ppm)	(ppm)	(ppm)	(ppm)	(ppm)	(ppm)	(ppm)	(ppm)	(ppm)	(ppm)	(ppm)	(ppm)	(%)						(mg L-1)	(mg g-1)	(%)	WA, Inverse, SWAP
age	depth	age.min	age.max	Notes	Al	Ca	Fe	K	Mg	Na	S	Si	P	Cl	Ti	V	Mn	Ni	Cu	Zn	Br	Sr	Zr	Ba	Pb	LOI	PC1	PC2	PC3	PC4	206Pb/207Pb	LW.TOC	Chl-a	bSi	pH	pH.SSE	Planktonic	Tychoplanktonic	Attached	Epipelic	Unknown
1976.5	0.5	1971	1981.5	Passive PCA sample	1.224	3.435	2.661	0.072	0.445	0.09	0.317	18.497	349	541	366	22	572	4	7	90	37.8	17	1	60	24	38.5768	2.28633	2.19178	-0.969336	0.102439		10.8446	0.0549815	14.3367	5.66937	0.346595	20.8738	24.2718	30.5825	23.301	0.970874
1958	1.5	1949	1964.5	Passive PCA sample	1.256	4.068	3.007	0.082	0.477	0.097	0.337	19.741	480	475	395	27	585	7	9	107	44.1	22	17	72	32	35.4575	2.60352	2.17999	-0.978721	0.607895
1939.5	2.5	1927	1947.5	Passive PCA sample	1.272	5.956	2.732	0.082	0.759	0.102	0.362	19.186	445	422	393	26	572	7	9	109	43.1	25	19	70	34	39.2727	4.12273	3.21426	-2.11454	1.4447
1920.5	3.5	1905.5	1930.5	Passive PCA sample	1.234	12.03	2.486	0.104	1.001	0.137	0.418	16.393	378	420	444	23	826	7	9	100	31.2	35	30	100	29	31.3869	6.31601	4.5345	-2.92568	1.69453	1.17374	10.0055	0.0525815	14.8358
1882.5	5.5	1862	1897.5		1.012	1.182	1.516	0.072	0.128	0.095	0.624	26.71	245	343	434	23	223	8	10	97	38.2	16	14	49	44	36.7568	0.7129	0.110287	0.0505256	-0.562042
1844.5	7.5	1818	1863		1.097	1.19	1.548	0.089	0.12	0.116	0.66	28.758	397	463	472	27	225	7	10	69	40.9	16	9	37	38	40.8526	0.714169	0.0688009	-0.0136192	-0.31245		9.83348	0.037485	38.4332	5.39759	0.345032	13.1707	11.7073	30.7317	41.9512	2.43902
1806.5	9.5	1774.5	1828.5		1.121	1.165	1.395	0.069	0.112	0.106	0.501	22.727	301	601	460	28	227	6	8	65	38.4	16	5	48	32	48.9362	0.536406	0.0774537	0.311201	-0.479773
1767.5	11.5	1731.5	1793.5		1.229	1.285	1.419	0.115	0.129	0.189	0.518	25.706	479	637	514	25	233	6	8	69	42.6	20	21	61	40	50.7799	0.95	-0.0767322	0.0581222	0.106057	1.16814	11.3973	0.0343768	38.7313
1729.5	13.5	1688	1758		1.018	1.015	1.226	0.052	0.109	0.088	0.361	24.497	295	610	435	25	215	5	7	53	40.3	16	4	47	36	45.611	0.359404	-0.0615591	0.337242	-0.506293
1691	15.5	1645	1722		1.052	1.073	1.272	0.096	0.116	0.131	0.364	29.04	419	504	479	25	204	7	10	69	39.7	19	10	48	49	42.6752	0.684164	-0.225342	-0.00285015	-0.0907198	1.16242	8.39888	0.0364065	27.9394
1652	17.5	1602.5	1684.5		1.03	0.885	1.195	0.061	0.106	0.094	0.303	24.426	316	535	434	22	192	4	8	41	36.5	18	12	43	34	44.3609	0.329069	-0.152848	0.229189	-0.395318
1613	19.5	1560.5	1646.5		1.072	0.858	1.256	0.068	0.113	0.094	0.303	28.934	528	512	437	25	185	5	9	32	40.3	19	9	41	32	42.9752	0.345793	-0.23392	0.0800844	-0.0275616		11.4996	0.039542	24.313
1573.5	21.5	1520	1608.5	C14 Bulk (738 +/- 32)	0.998	0.706	1.191	0.034	0.106	0.091	0.285	26.662	414	552	381	26	187	5	7	27	39.8	18	6	57	26	42.9921	0.178975	-0.255783	0.198638	-0.127921
1534	23.5	1479	1569		1.049	0.712	1.323	0.033	0.106	0.084	0.332	27.162	553	638	383	28	180	5	7	25	44	20	8	55	25	42.4399	0.135814	-0.291934	0.300626	0.0862927	1.16276	16.444	0.0362806	50.4513	5.37392	0.344924	0	13	29	55	3
1494	25.5	1437.5	1529		1.002	0.564	1.241	0.023	0.101	0.082	0.299	24.45	409	647	355	24	175	5	7	28	45.6	20	8	60	25	42.5113	0.0275954	-0.318033	0.487	-0.103453
1453	27.5	1395.5	1487.5		0.993	0.543	1.335	0.024	0.105	0.075	0.307	27.673	552	612	386	27	173	5	7	29	49.3	21	15	68	23	42.0857	0.0558371	-0.419589	0.433611	0.200787		15.8627	0.0389117	31.6339
1411.5	29.5	1353	1445.5		0.95	0.457	1.28	0.006	0.101	0.059	0.291	26.64	469	617	336	29	172	6	7	24	49.9	21	17	62	25	41.5008	-0.0938326	-0.401562	0.554643	0.102513
1390.5	30.5	1330	1424		0.959	0.46	1.374	0.006	0.106	0.058	0.371	26.3	503	563	373	32	178	5	8	33	50.5	21	9	72	22	35.7928	-0.00242382	-0.4003	0.456944	0.252778	1.15882	16.4277	0.0399682	65.1612
1348	32.5	1284	1380		0.943	0.479	1.306	0.022	0.11	0.066	0.328	29.246	515	495	339	30	169	6	7	23	48.8	20	10	62	17	38.5886	0.0190724	-0.384166	0.273215	0.231771
1304	34.5	1240	1336		0.959	0.469	1.378	0.029	0.111	0.073	0.356	29.3	504	500	371	29	183	5	8	15	48.1	21	9	52	16	35.8678	0.0681849	-0.348464	0.185624	0.287472	1.21322	16.5823	0.0402832	37.252
1259.5	36.5	1194.5	1293.5		1.03	0.528	1.456	0.014	0.105	0.059	0.423	27.651	656	582	367	33	180	6	9	29	49.5	21	8	68	11	44.4444	-0.00164144	-0.31925	0.472712	0.323328
1213.5	38.5	1149	1251	C14 Bulk (1148 +/- 31)	0.912	0.416	1.294	0.002	0.103	0.056	0.325	28.715	490	476	314	27	173	5	7	16	44.5	16	0	29	10	36.0632	-0.136196	-0.163641	0.186202	-0.207484	1.23385	16.8762	0.0461461	47.3285	5.4515	0.349537	3.44828	16.7488	13.3005	62.5616	3.94089
1166	40.5	1099	1208		0.786	0.396	1.039	0	0.099	0.048	0.23	34.057	405	346	263	23	157	5	7	8	40.1	16	7	29	6	28.7823	-0.188319	-0.319432	-0.136451	-0.228504	1.2289
1118	42.5	1046.5	1165		0.775	0.348	1.035	0	0.098	0.057	0.208	34.057	387	356	268	18	151	6	8	19	37.2	15	3	30	7	26.4901	-0.151421	-0.309477	-0.2316	-0.37755	1.2393	15.7919	0.0483546	77.3599
1093.5	43.5	1020	1143	Medieval Pb	0.791	0.396	1.034	0	0.098	0.045	0.218	34.705	435	334	271	23	153	5	7	11	39.2	15	0	31	6	29.6687	-0.185517	-0.322073	-0.165822	-0.264843
1069	44.5	994	1121.5		0.801	0.387	1.019	0	0.098	0.049	0.214	35.257	414	307	270	23	150	5	7	10	37.8	15	3	30	4	29.5421	-0.172052	-0.325853	-0.235243	-0.252894	1.26825
1044.5	45.5	967.5	1100		0.8	0.373	1.016	0	0.098	0.048	0.206	35.405	439	265	255	23	150	5	7	13	35.9	15	1	16	4	26.0337	-0.185566	-0.269531	-0.324723	-0.289501
1019.5	46.5	940.5	1078.5		0.838	0.338	1.042	0	0.1	0.054	0.21	33.665	432	285	276	22	149	5	7	9	35.5	14	0	21	1	26.1868	-0.17182	-0.241853	-0.326336	-0.324464	1.31804	16.6439	0.0433957	83.6656	5.46246	0.349501	5.26316	33.5526	16.1184	45.0658	0
920.5	50.5	833	990	C14 Bulk (1566 +/- 30); Mediaval Pb	0.963	0.412	1.258	0	0.103	0.053	0.241	30.901	555	353	301	28	170	5	8	9	40.5	17	2	38	0	32.0061	-0.15911	-0.245151	-0.039676	0.00445856	1.43493
822.5	54.5	730	900		1.005	0.431	1.3	0	0.104	0.045	0.25	30.922	617	325	299	29	173	5	8	14	41.1	18	1	33	0	31.1502	-0.173472	-0.21658	-0.00415339	0.0602665	1.60149	16.9636	0.0440594	72.55
725.5	58.5	629.5	809.5		1.083	0.419	1.302	0	0.103	0.052	0.233	28.79	569	300	331	29	175	4	8	7	38.8	17	0	42	0	31.9149	-0.149538	-0.206737	-0.0107805	0.0131318
630	62.5	532.5	717.5		1.12	0.422	1.349	0	0.104	0.057	0.252	30.496	651	303	308	33	176	5	8	12	38	17	1	43	0	32.2183	-0.120426	-0.197496	-0.107437	0.150484
535	66.5	435.5	624		1.115	0.413	1.309	0	0.104	0.068	0.26	30.576	643	386	292	30	170	5	8	8	39.6	17	0	37	0	31.9149	-0.135825	-0.19692	-0.0921337	0.100513	1.67121	17.4837	0.0407025	70.1779	5.42289	0.34834	6.76329	21.7391	17.3913	51.6908	2.41546
441	70.5	344	530		1.206	0.41	1.385	0.001	0.106	0.056	0.279	30.312	701	281	300	36	174	8	9	17	37.7	16	0	22	0	32.0127	-0.130851	-0.0657347	-0.14246	0.0981411
348	74.5	252	436.5		1.217	0.413	1.407	0.006	0.106	0.06	0.264	29.392	667	275	313	32	174	7	9	14	39.6	17	0	36	0	31.7804	-0.119393	-0.14038	-0.0585454	0.117878
255.5	78.5	159	341.5		1.284	0.436	1.528	0.013	0.11	0.072	0.29	29.913	707	324	338	33	186	6	9	14	38	18	0	27	0	34.3003	-0.0301039	-0.066857	-0.132851	0.216093	1.55742	17.882	0.0396662	65.8204	5.31562	0.347724	0	24.1379	8.37438	65.0246	2.46305
164.5	82.5	69	247.5		1.284	0.415	1.432	0.013	0.11	0.093	0.284	30.623	653	365	326	32	179	6	8	9	36.2	18	4	18	0	31.2121	0.00453144	-0.0782941	-0.294234	0.220197
73.5	86.5	-21.5	152.5		1.24	0.408	1.413	0.01	0.108	0.079	0.267	31.494	654	279	306	30	179	10	9	13	38.2	18	4	42	1	30.2362	-0.036326	-0.187672	-0.213686	0.227439	1.40897
28	88.5	-65.5	105.5	Roman Pb	1.339	0.42	1.464	0	0.11	0.06	0.289	31.001	723	303	306	34	187	9	10	8	40.3	18	1	41	1	34.6519	-0.113335	-0.118379	-0.0490519	0.268358	1.38096
-17.5	90.5	-113.5	58		1.354	0.431	1.528	0.005	0.109	0.072	0.288	29.819	730	326	311	34	187	6	10	16	39.6	17	0	29	0	32.2034	-0.081445	-0.0437499	-0.107761	0.184864	1.38494			64.6279
-62.5	92.5	-158.5	11		1.324	0.406	1.532	0.002	0.11	0.061	0.29	32.238	686	277	303	27	185	5	9	19	36.6	17	0	42	0	34.0641	-0.071836	-0.0743621	-0.154142	0.0568387
-107.5	94.5	-204	-36.5		1.292	0.423	1.491	0.005	0.11	0.076	0.273	30.493	672	312	311	33	185	6	9	15	38	17	0	37	0	32.3881	-0.0449735	-0.094578	-0.179266	0.192614	1.46568	17.1339	0.0419738	67.7242
-152	96.5	-249	-83.5		1.24	0.42	1.452	0.005	0.111	0.062	0.276	31.572	624	294	319	31	189	6	10	13	39.1	19	4	33	0	36.1592	-0.0678168	-0.118397	-0.0752258	0.201591
-197	98.5	-293.5	-130.5		1.318	0.438	1.49	0.023	0.112	0.093	0.288	28.913	594	330	346	31	189	6	9	12	38.3	19	8	49	0	33.9623	0.066933	-0.159754	-0.151219	0.303614				63.7611
-242	100.5	-338	-178	Spruce	1.293	0.421	1.452	0.015	0.111	0.08	0.304	31.23	598	305	336	28	190	6	9	15	35.3	18	2	33	0	36.0465	0.0287087	-0.0681364	-0.206361	0.104159
-286.5	102.5	-382.5	-224.5		1.212	0.395	1.373	0.011	0.107	0.076	0.263	30.739	527	302	304	29	179	5	8	12	33.6	17	0	27	0	30.6483	-0.0349256	-0.0913372	-0.292217	0.0130992	1.6909			76.4896
-331	104.5	-427	-271.5		1.232	0.397	1.369	0	0.108	0.056	0.269	31.798	633	276	305	27	182	6	9	10	36.1	17	0	50	0	34.7967	-0.0989973	-0.151875	-0.127418	0.0524503
-375.5	106.5	-469.5	-317.5		1.285	0.43	1.515	0.002	0.108	0.067	0.274	30.183	646	311	297	29	186	6	10	11	38.3	19	1	35	0	32.5623	-0.104362	-0.106537	-0.0702233	0.15548				71.1771
-420	108.5	-514.5	-363.5		1.259	0.401	1.461	0	0.108	0.055	0.273	31.702	662	305	290	25	185	6	10	18	36.1	17	0	12	0	33.1307	-0.143118	0.0231808	-0.127843	-0.127956
-465	110.5	-559.5	-409	C14 Bulk (2768 +/- 30)	1.255	0.426	1.491	0	0.108	0.058	0.271	30.017	608	321	298	27	190	7	10	13	37.5	17	0	32	0	33.3333	-0.125297	-0.0404481	-0.0596366	-0.0521066	1.74448	16.8709	0.0425594	60.8701	5.46758	0.346803	0.485437	18.932	13.1068	66.9903	0.485437
-509	112.5	-605.5	-451.5		1.264	0.425	1.421	0	0.109	0.056	0.286	31.015	619	306	288	28	189	6	10	17	38	17	0	16	0	34.3939	-0.136335	0.01566	-0.0660912	-0.0846156
-554	114.5	-652	-492		1.306	0.455	1.559	0.001	0.108	0.06	0.3	29.097	645	340	311	30	201	6	11	11	37.5	18	0	36	0	35.3846	-0.100605	-0.0224486	-0.00733238	0.0658925				51.9106
-576	115.5	-674.5	-512.5		1.311	0.458	1.763	0.002	0.109	0.07	0.354	29.823	652	324	301	31	204	12	10	22	35.3	20	1	52	0	34.7107	-0.00469826	-0.0626165	-0.0879308	0.250168
-665	119.5	-766.5	-594.5		1.368	0.456	1.707	0	0.109	0.063	0.329	28.749	667	324	294	31	205	7	10	13	38.5	19	0	36	0	34.4774	-0.101763	0.00763974	0.0202888	0.140765				66.288
-754	123.5	-861	-675		1.41	0.456	1.727	0	0.111	0.111	0.317	28.61	670	492	291	26	207	7	11	17	39.9	19	3	52	0	34.8438	0.00989612	-0.0491267	-0.0381113	0.201527		17.33	0.0442965	56.119
-843	127.5	-956.5	-756.5		1.514	0.459	1.847	0	0.111	0.144	0.318	27.361	644	625	310	34	211	7	11	15	39.7	19	2	28	0	36.194	0.0757104	0.0477544	-0.128494	0.334545				64.0328
-932	131.5	-1056.5	-838.5		1.525	0.481	1.985	0.002	0.112	0.104	0.32	27.353	661	451	318	38	220	6	11	15	39.3	19	0	25	0	37.5887	0.0119681	0.112107	-0.0432486	0.317338				55.2466
-1021	135.5	-1155.5	-921		1.44	0.424	1.983	0	0.109	0.066	0.293	29.176	581	319	283	29	201	8	11	17	35.3	17	0	22	0	32.8502	-0.102573	0.127662	-0.116448	-0.0753559				67.333
-1110	139.5	-1254.5	-1001.5		1.308	0.374	1.801	0	0.107	0.066	0.297	31.169	470	282	254	28	187	6	9	14	31.7	15	0	8	0	28.3122	-0.108925	0.12849	-0.347733	-0.251113
-1199	143.5	-1353	-1083		1.351	0.39	1.786	0	0.107	0.058	0.283	30.811	537	290	264	24	191	8	10	15	36.5	17	5	17	0	29.8643	-0.157957	0.0655219	-0.128149	-0.190044
-1288	147.5	-1451	-1164		1.443	0.439	1.98	0	0.11	0.058	0.302	29.206	622	320	276	29	209	8	11	20	38.3	18	0	23	0	34.7143	-0.13132	0.130126	0.0148333	-0.0340391				64.8199
-1377	151.5	-1549	-1246		1.415	0.402	1.839	0	0.105	0.064	0.27	25.199	416	342	267	26	198	6	10	17	32.8	15	0	41	0	34.9769	-0.133602	0.130672	0.00927825	-0.360384
-1466	155.5	-1647.5	-1328		1.524	0.432	2.081	0	0.111	0.067	0.298	27.623	588	327	291	28	210	7	12	29	38.4	17	0	29	0	34.2988	-0.0930516	0.170131	0.0344069	-0.111015
-1554.5	159.5	-1747	-1409.5		1.524	0.469	1.9	0.003	0.114	0.075	0.309	29.189	656	337	318	28	219	10	14	15	38.2	18	0	13	0	35.4531	-0.0598918	0.183866	-0.0435711	-0.0061884	1.96146	17.0136	0.0515884	55.8119	5.40306	0.345984	5.44554	11.8812	15.3465	67.3267	0
-1643	163.5	-1845.5	-1492		1.421	0.41	1.745	0.003	0.111	0.067	0.281	30.082	494	251	303	28	197	6	11	16	35.1	17	0	43	0	31.2381	-0.0439182	-0.00519877	-0.184196	-0.0144185
-1732	167.5	-1944	-1574.5		1.316	0.388	1.616	0	0.106	0.06	0.27	30.718	454	258	266	21	188	7	11	9	35.8	16	0	32	0	30.0347	-0.15076	-0.00364237	-0.136656	-0.280362
-1821	171.5	-2042.5	-1656.5		1.367	0.406	1.693	0.009	0.11	0.066	0.302	30.406	508	264	319	28	194	7	11	14	34.9	17	2	43	0	30.3473	-0.0200504	-0.0397765	-0.222656	0.0131187				62.5132
-1910	175.5	-2140.5	-1739.5		1.331	0.402	1.694	0	0.106	0.066	0.332	30.502	444	265	274	25	193	7	10	17	36.8	16	0	30	0	30.17	-0.100479	0.0316479	-0.13688	-0.219388
-1998.5	179.5	-2238.5	-1821.5		1.396	0.405	1.592	0	0.11	0.065	0.375	31.416	529	276	271	21	192	6	11	11	36.7	17	2	37	0	29.0462	-0.0908199	0.0124852	-0.153342	-0.158333
-2087	183.5	-2336	-1904		1.479	0.433	1.689	0	0.112	0.068	0.329	30.592	554	302	292	25	205	7	11	15	37.5	18	0	30	0	33.8369	-0.076604	0.0684194	-0.0685561	-0.0596686				71.5611
-2131.5	185.5	-2385	-1944.5		1.442	0.413	1.644	0	0.11	0.064	0.295	29.647	556	292	288	25	204	7	12	15	37.5	18	2	36	0
-2176	187.5	-2433.5	-1985		1.494	0.426	1.668	0	0.113	0.06	0.319	29.329	599	311	302	27	206	7	12	12	38.3	18	0	37	0
-2353	195.5	-2628	-2150		1.446	0.408	1.572	0	0.111	0.072	0.311	30.858	558	292	290	22	200	7	11	7	36.5	17	1	27	0	34.5725	-0.0975176	0.0635377	-0.101543	-0.155534		17.5474	0.0388915	69.3337
-2619	207.5	-2917	-2399.5		1.449	0.398	1.583	0	0.11	0.058	0.286	29.304	526	275	270	24	195	6	10	6	33.5	15	0	21	0	35.7422	-0.153154	0.151903	-0.0981	-0.330688				68.8454
-2885	219.5	-3194.5	-2650.5		1.438	0.39	1.526	0	0.111	0.06	0.286	29.317	427	268	270	22	196	6	10	5	32.5	15	0	0	0	35.6185	-0.15681	0.231325	-0.127406	-0.480228				65.2759
-3150	231.5	-3480	-2903.5		1.455	0.415	1.628	0	0.11	0.058	0.295	29.115	568	273	264	26	207	8	12	12	37.3	17	0	21	0	36.476	-0.162938	0.136737	0.029292	-0.186889				64.011
-3416	243.5	-3761	-3151		1.586	0.478	1.902	0	0.118	0.06	0.342	29.429	683	319	296	30	229	9	13	15	38.4	19	0	21	0	38.4036	-0.0798885	0.216459	0.0398661	0.0674496		17.9624	0.0373246	63.5556	5.44717	0.345983	7.66129	7.66129	41.5323	42.7419	0.403226
-3681	255.5	-4037.5	-3400.5		1.664	0.475	2.08	0	0.115	0.063	0.353	26.339	685	301	291	34	224	8	14	26	38.9	18	0	2	0	40.6752	-0.114204	0.360845	0.158703	-0.0524174				38.792
-3858	263.5	-4214	-3569.5		1.622	0.459	1.993	0	0.114	0.063	0.381	27.63	624	321	268	30	222	11	12	15	39.3	19	0	17	0	38.0201	-0.124745	0.254538	0.130211	-0.0196833
-4123	275.5	-4483	-3817.5		1.581	0.464	1.974	0	0.113	0.063	0.344	29.304	604	316	265	32	220	9	12	20	39.2	20	0	23	0	36.9952	-0.104033	0.163215	0.0661164	0.109958
-4387.5	287.5	-4756	-4066		1.632	0.441	2.293	0	0.111	0.056	0.333	28.535	603	242	261	33	225	8	14	17	35.9	18	0	18	0	35.814	-0.130175	0.277497	-0.0114939	-0.019751
-4652	299.5	-5049	-4313		1.685	0.497	2.381	0	0.114	0.062	0.422	26.624	770	295	275	38	242	10	17	31	43.2	19	0	3	0	41.5546	-0.119909	0.404673	0.267507	0.0970758		16.3839	0.0420027	27.5856	5.56549	0.345848	3.41463	12.1951	20.4878	62.439	1.46341
-4917	311.5	-5315	-4556		1.706	0.477	2.178	0	0.113	0.06	0.369	27.634	739	276	278	34	225	8	17	24	39.8	19	0	3	0	38.3562	-0.137825	0.334119	0.141372	0.0419653
-5181	323.5	-5597	-4806.5		1.692	0.463	2.476	0	0.112	0.05	0.382	25.93	734	271	257	32	230	9	19	34	45.4	19	1	25	0	40.7461	-0.186752	0.313771	0.407729	-0.000648545
-5446	335.5	-5855	-5050		1.829	0.493	2.417	0	0.114	0.058	0.372	26.08	847	307	280	33	236	8	18	23	42.6	20	0	18	0	39.3043	-0.162463	0.344086	0.299165	0.142313
-5578	341.5	-6000.5	-5172.5		1.613	0.441	2.554	0	0.11	0.06	0.401	24.027	645	287	283	34	219	9	19	29	41.3	17	0	0	0	39.8589	-0.159789	0.42193	0.277799	-0.174328
-5842	353.5	-6297.5	-5417		1.678	0.472	2.525	0	0.113	0.054	0.36	25.133	739	311	269	29	231	9	20	23	43.8	17	0	4	0	41.1168	-0.210954	0.434974	0.358389	-0.211345
-6107	365.5	-6592.5	-5664		1.599	0.48	2.776	0.007	0.119	0.073	0.42	25.815	748	315	300	36	239	10	19	33	45.7	18	0	11	0	40.7749	-0.0468961	0.399549	0.243458	0.101838
-6371	377.5	-6857	-5903.5		1.604	0.483	2.407	0.011	0.119	0.086	0.42	26.859	752	336	296	25	220	10	19	31	43.7	20	2	27	0	40.2482	-0.00908261	0.251162	0.220341	0.0782617		14.8419	0.0408144	32.1472	5.70777	0.345654	7.82609	13.0435	19.1304	58.6957	1.30435
-6635	389.5	-7133	-6138.5		1.718	0.506	2.13	0.007	0.119	0.074	0.403	24.165	864	335	304	30	226	10	23	27	40.2	19	0	0	0	42.4749	-0.0817052	0.426631	0.269095	-0.017204
-6899	401.5	-7430	-6376		1.638	0.489	2.127	0.024	0.124	0.088	0.396	24.348	843	361	313	28	223	8	21	27	38.4	20	0	29	0	40.8759	0.0554774	0.284747	0.129852	0.166569
-7163	413.5	-7714.5	-6613		1.798	0.528	2.276	0.029	0.126	0.083	0.438	24.685	1095	383	363	34	235	10	28	33	43.7	22	1	25	0	43.8623	0.073942	0.304543	0.275545	0.494887
-7229	416.5	-7786	-6672		1.799	0.536	2.214	0.026	0.127	0.09	0.439	25.247	1109	404	359	32	238	10	26	29	40.6	20	0	28	0	42.3729	0.100409	0.340853	0.137304	0.39088
-7493	428.5	-8078	-6909		1.283	0.48	2.406	0.043	0.124	0.107	0.524	29.101	662	383	368	32	228	10	24	40	38.9	18	0	21	0	38.6473	0.303845	0.23876	-0.221086	0.204474
-7757	440.5	-8379.5	-7136.5		1.186	0.453	2.467	0.049	0.121	0.1	0.476	29.125	501	328	330	27	220	9	24	33	33	16	0	19	0	37.5445	0.274689	0.274375	-0.356151	-0.103808
-8020	452.5	-8669	-7363		1.161	0.466	2.68	0.053	0.124	0.123	0.459	30.425	506	393	340	31	227	10	27	37	33.7	18	3	23	0	37.1814	0.383704	0.210478	-0.475732	0.194537		11.714	0.046408	27.8818	6.2667	0.351899	16.0173	29.8701	26.4069	25.1082	2.5974
-8284	464.5	-8966.5	-7600		1.271	0.465	3.875	0.092	0.126	0.129	0.449	29.694	558	327	401	43	259	10	30	43	31.6	19	1	19	0	34.9043	0.574937	0.340912	-0.712261	0.582052
-8548	476.5	-9263.5	-7839	Passive PCA sample	1.796	0.573	4.202	0.286	0.165	0.335	0.514	28.085	434	351	653	69	289	20	44	62	33.3	29	16	73	0	34.3032	1.92274	-0.0384706	-1.71255	2.57319
-8812	488.5	-9559.5	-8072	Passive PCA sample	1.976	0.662	9.984	0.302	0.215	0.387	1.267	13.514	308	552	815	105	371	26	67	104	47.6	31	81	100	3	48	2.67504	0.922082	-1.44085	3.50772
-8922	493.5	-9683.5	-8156	Passive PCA sample	4.473	0.918	2.005	1.63	0.563	1.99	0.037	29.958	311	55	2240	47	299	6	9	16	2.3	124	218	685	9	2.69461	11.8052	-4.53582	-10.1839	16.3222
-9075	500.5	-9855.5	-8287.5	Passive PCA sample	2.636	0.667	1.417	0.928	0.254	0.952	0.33	27.642	116	200	1398	46	221	10	34	23	10.2	80	162	368	5	11.3438	5.81446	-2.88069	-4.89362	8.28672

## Sheet: Mosjökälla
Info					Majors								Minors																	PCA					lake-water conc.	sediment conc.		Diatoms
CE			cm, mid sample		(%)	(%)	(%)	(%)	(%)	(%)	(%)	(%)	(ppm)	(ppm)	(ppm)	(ppm)	(ppm)	(ppm)	(ppm)	(ppm)	(ppm)	(ppm)	(ppm)	(ppm)	(ppm)	(ppm)	(ppm)	(ppm)	(%)						(mg L-1)	(mg g-1)	(%)	WA, Inverse, SWAP
age	age.min	age.max	depth	Notes	Al	Ca	Fe	K	Mg	Na	S	Si	P	Cl	Ti	V	Mn	Ni	Cu	Zn	Ga	Br	Rb	Sr	Zr	Ba	W	Pb	LOI	PC1	PC2	PC3	PC4	206Pb/207Pb	LW.TOC	Chl	bSi	pH	pH.SSE	Planktonic	Tychoplanktonic	Attached	Epipelic	Unknown
1990	1984.5	1996	0.5	Sampling: 2010	1.266	12.205	8.634	0.045	1.581	0.109	1.215	6.693	548	554	397	29	2180	7	14	165	4	47.5	5	34	44	93	3	111							8.11723	0.0466298	5.62623	6.10404	0.349017	70.7921	5.44554	10.8911	12.3762	0.49505
1952	1945.5	1966	1.5	Liming: 1986	1.177	17.31	4.289	0.047	2.332	0.115	0.457	6.448	237	364	446	32	1637	8	17	145	5	47.2	8	40	42	76	3	128
1914.5	1906.5	1936	2.5	Passive PCA sample	2.461	1.312	3.839	0.332	0.201	0.122	0.576	12.602	756	759	936	75	792	14	26	184	8	64.4	24	24	23	118	2	176	49.3069	1.02641	1.0669	-0.0468615	-0.11703	1.11602	7.20097	0.0425226	8.90361	5.89387	0.345574	53.1381	4.60251	17.9916	24.2678	0
1839	1829.5	1876.5	4.5		2.378	0.75	2.154	0.291	0.158	0.248	0.553	15.6	528	726	1014	55	478	13	28	206	10	72.3	21	28	46	164	3	189	46.1938	0.85	0.430048	-0.0890078	-0.0965562
1764.5	1751.5	1817	6.5		2.357	0.836	1.681	0.272	0.158	0.323	0.429	18.212	456	686	1038	45	342	6	15	182	8	59.6	17	26	43	146	1	148	43.7803	0.767775	0.11643	-0.208984	-0.0274132		7.445	0.0323767	20.6021	5.54089	0.34482	35.5	2	12	50.5	0
1690.5	1674	1757	8.5		2.35	0.863	1.66	0.199	0.161	0.285	0.388	17.714	486	775	932	42	354	7	13	94	7	65.3	15	27	44	148	1	129	45.8065	0.622014	0.0236857	-0.209983	0.0293013
1617.5	1598	1697	10.5		2.346	0.799	1.585	0.213	0.145	0.314	0.319	19.146	499	776	961	45	303	5	11	74	7	63.9	14	25	33	132	2	109	45.4023	0.521204	-0.0998345	-0.211359	-0.0359955	1.10033	9.07263	0.0354371	30.6671	5.6877	0.346226	53.3981	1.45631	13.1068	32.0388	0
1545.5	1522.5	1636	12.5		1.944	0.62	1.294	0.144	0.119	0.2	0.259	17.089	274	781	850	35	239	4	9	55	6	54.7	12	23	33	112	1	82	44.012	0.267432	-0.369455	-0.166062	-0.128043
1475.5	1448.5	1575	14.5		2.15	0.72	1.346	0.194	0.131	0.285	0.275	16.874	448	943	999	41	260	5	10	37	6	61.9	13	23	28	119	1	90	49.916	0.398716	-0.272771	-0.0485785	-0.161781	1.08667	9.35578	0.0378365	16.0755
1407	1376	1513.5	16.5		2.013	0.671	1.335	0.129	0.121	0.213	0.298	15.571	394	1175	907	40	238	4	11	32	6	63.6	11	24	31	120	1	94	53.7943	0.28837	-0.366727	0.0561904	-0.167783
1339.5	1304	1451.5	18.5	C14 Macro (722 +/- 30)	2.04	0.761	1.433	0.118	0.123	0.182	0.368	15.614	555	1374	721	45	249	5	10	67	5	67.2	10	22	12	112	1	74	58.9862	0.219611	-0.29132	0.121513	-0.180714	1.11364	11.1027	0.0483596	15.7082	5.72677	0.346532	37.0213	13.1915	16.1702	33.617	0
1275	1233.5	1388	20.5		1.831	0.601	1.347	0.073	0.114	0.122	0.34	17.052	487	1148	592	38	225	5	11	58	4	68.3	9	23	17	116	2	75	54.8291	0.0823596	-0.403602	-0.0205958	-0.12522	1.12765
1212	1163.5	1324.5	22.5		2.1	0.699	1.654	0.057	0.108	0.101	0.414	14.472	793	1442	578	52	245	5	12	85	4	73.4	7	23	9	108	1	38	60.5357	0.0585956	-0.301717	0.216913	-0.180192	1.221	12.3821	0.0470925	18.1507
1149.5	1094.5	1259.5	24.5		2.083	0.582	1.578	0.029	0.103	0.09	0.423	13.768	772	1537	529	53	244	6	11	73	4	78.4	7	24	11	106	2	27	62.8952	-0.0155808	-0.408475	0.285068	-0.165153	1.25371	12.8438	0.0475821	11.8067	5.62319	0.345716	35.4839	11.5207	15.6682	37.3272	0
1087	1026	1192	26.5		2.578	0.736	1.941	0.031	0.107	0.071	0.54	12.6	1203	1715	596	70	285	7	15	91	5	89.7	7	30	8	143	3	17	68.5512	0.045328	-0.221304	0.458328	-0.0566953	1.33146
1024	957	1122	28.5		2.926	0.744	2.603	0.016	0.107	0.081	0.563	10.664	1470	1495	589	85	305	7	19	93	5	95.3	6	34	12	181	3	9	67.0796	0.0641397	-0.133094	0.537508	0.0462324	1.50993	14.0082	0.0484105	11.9195
958.5	887.5	1049.5	30.5		2.999	0.828	2.803	0.033	0.112	0.069	0.661	13.195	1722	1192	646	97	341	9	17	90	6	105.5	8	36	11	132	3	6	66.0142	0.100767	0.00343295	0.508039	0.0525276
925.5	852.5	1012.5	31.5		3.083	0.761	3.487	0.028	0.11	0.056	0.647	12.287	1848	1185	628	92	324	10	18	81	5	98.4	7	34	9	168	4	8	65.9449	0.0461986	-0.0250316	0.46804	0.10348
891.5	817.5	974.5	32.5	C14 Macro (1069 +/- 30); Medieval Pb	2.905	0.737	3.263	0.025	0.114	0.09	0.678	12.175	1592	1140	625	83	320	9	17	75	6	88.6	7	35	14	177	4	8	63.3484	0.0639853	-0.0641061	0.363052	0.142203	1.57977	14.5061	0.0479392	13.865	5.5677	0.34556	31.3433	10.9453	20.398	37.3134	0
856.5	782	935.5	33.5		2.411	0.647	1.94	0.034	0.108	0.07	0.503	15.093	1132	951	636	64	267	7	15	29	5	78.5	7	28	7	122	3	3	61.5984	-0.0413875	-0.246352	0.214408	-0.10231
821	745.5	896	34.5		2.486	0.645	1.701	0.033	0.116	0.077	0.504	16.229	1134	980	581	55	272	6	14	24	5	81.1	7	31	7	153	2	2	59.3466	-0.0514557	-0.26664	0.0720009	0.0418162	1.63204
747.5	672.5	816.5	36.5		2.605	0.631	1.999	0.023	0.108	0.085	0.502	14.006	1220	951	527	60	274	8	14	56	4	85.7	7	29	9	132	4	3	60.5405	-0.0407062	-0.245926	0.221483	-0.0383554	1.59393	13.5889	0.0483463	11.045	5.68104	0.347868	57.6355	5.91133	10.3448	26.1084	0
670.5	597.5	737.5	38.5		3.101	0.754	2.812	0.017	0.115	0.084	0.72	16.009	2116	1131	484	68	334	9	19	81	4	98.8	6	36	9	181	3	6	59.469	-0.00649722	0.0786982	0.0847576	0.209709
592	521.5	659.5	40.5		2.904	0.74	3.445	0.021	0.114	0.09	0.673	16	2020	953	459	68	341	11	20	76	4	94.8	6	38	14	212	4	7	54.0925	-0.00478972	0.0611384	-0.0275902	0.335769	1.48218
511.5	443.5	580	42.5		2.765	0.74	3.763	0.017	0.114	0.089	0.703	15.556	1954	1016	453	65	355	11	17	90	4	96.1	6	39	18	216	4	9	58.3333	0.0101659	-0.00078855	0.0305312	0.410426
429.5	364	499.5	44.5		2.542	0.642	2.57	0.019	0.108	0.084	0.501	16.318	1325	858	450	48	291	8	12	57	4	78.7	6	31	3	148	3	8	51.1719	-0.0975214	-0.193521	-0.107385	0.133007	1.41521				5.61946	0.344777	24.2291	9.2511	17.1806	49.3392	0
346.5	282.5	418.5	46.5	C14 Macro (1797 +/- 33)	2.691	0.69	2.313	0.015	0.111	0.072	0.508	16.164	1384	984	467	51	298	7	14	61	4	75.3	6	34	5	169	3	10	56.5724	-0.0704421	-0.170918	-0.0366491	0.159519
263	200	337.5	48.5		2.756	0.671	2.514	0.025	0.112	0.091	0.512	16.096	1407	939	495	50	298	7	14	48	4	80.9	6	34	11	189	2	10						1.40759	13.6311	0.0495699	21.551
179	116	255.5	50.5		2.816	0.723	2.556	0.024	0.116	0.085	0.568	17.518	1628	875	491	50	316	8	14	60	4	81.3	6	35	8	174	3	17	55.1613	-0.0351975	-0.0833635	-0.119785	0.232359
94	31.5	174.5	52.5		2.879	0.712	2.864	0.03	0.117	0.112	0.552	17.299	1598	896	476	51	321	8	16	64	5	84.6	6	33	5	160	2	24	53.8614	-0.0138202	-0.0143209	-0.121311	0.167598	1.28867			21.2467	5.71208	0.344815	36.0784	14.5098	15.2941	32.549	1.56863
10	-54	93	54.5	Roman Pb^	2.949	0.786	3.341	0.006	0.112	0.067	0.57	14.745	1718	1006	445	58	352	11	15	60	3	90.2	6	34	0	136	3	28	58.1056	-0.0440025	0.025773	0.0673212	0.127055	1.27448
-74	-139.5	12.5	56.5		2.874	0.753	3.967	0.009	0.11	0.099	0.558	15.52	1842	954	430	57	364	10	17	81	4	95.5	6	34	7	175	4	25	54.5817	-0.0162418	0.0497984	-0.0286481	0.258153	1.27622	13.7672	0.0475621	17.1227
-158	-224.5	-68	58.5		2.532	0.685	2.434	0.016	0.113	0.075	0.507	17.313	1280	801	430	40	307	8	13	47	2	75	6	33	10	181	2	16	53.0142	-0.0788562	-0.184862	-0.19381	0.233814	1.27999
-241	-309	-148	60.5		2.382	0.6	2.245	0.019	0.108	0.092	0.433	17.058	1032	745	431	38	280	9	11	36	3	64.4	6	26	0	129	1	11	48.9796	-0.131328	-0.238775	-0.223564	0.0200803	1.27748			13.0359	5.82019	0.346892	44.1748	8.73786	12.1359	33.9806	0.970874
-323.5	-393	-227.5	62.5		2.504	0.652	2.285	0.021	0.114	0.08	0.493	18.627	1214	805	458	38	292	6	12	40	3	70.1	6	32	8	152	2	15	52.7143	-0.0920841	-0.198908	-0.24591	0.166548	1.28455
-404.5	-475.5	-306	64.5	Spruce	2.576	0.648	2.349	0.026	0.114	0.096	0.471	18.673	1197	800	456	39	290	7	13	39	3	71.4	6	31	9	180	3	8	49.9244	-0.0860073	-0.200471	-0.287536	0.215816	1.36249	13.4044	0.0498546	19.3885
-485	-556.5	-384.5	66.5		2.892	0.726	2.695	0.02	0.114	0.081	0.608	18.114	1544	863	463	45	326	8	17	68	4	88.5	6	36	10	182	4	4	53.3333	-0.0491071	-0.0149273	-0.186692	0.269841	1.55349
-563.5	-636.5	-461	68.5		3.325	0.815	4.176	0.015	0.115	0.082	0.724	15.348	2007	989	475	55	387	12	22	73	4	91.4	6	38	7	184	6	5	54.4643	-0.0151308	0.269049	-0.0981549	0.280791				16.5889
-641	-714.5	-537	70.5		3.073	0.799	2.784	0.008	0.114	0.076	0.562	15.537	1452	967	455	50	347	8	16	57	3	73.1	5	37	7	174	3	4	56.5506	-0.0431414	9.44579e-05	-0.0724382	0.212493
-716.5	-790.5	-611.5	72.5		2.967	0.733	2.701	0.003	0.108	0.061	0.489	14.534	1181	866	453	47	326	7	16	43	3	68	5	34	0	176	3	3	53.8462	-0.103991	-0.0878073	-0.0754548	0.146453	1.63234	13.8297	0.0480739	20.0717	5.5755	0.371479	10.0962	44.7115	14.9038	30.2885	0
-790	-864.5	-684.5	74.5		3.323	0.909	3.113	0.003	0.119	0.063	0.674	16.144	1513	1014	488	53	382	10	19	60	4	76.7	5	41	5	208	4	3	57.5646	-0.0135865	0.147466	-0.108722	0.340898
-861.5	-936	-756	76.5	C14 Macro (2789 +/- 45)	2.782	0.705	2.655	0.004	0.106	0.057	0.479	13.64	975	873	443	47	318	7	15	45	3	68.7	5	31	0	166	2	0	55.1282	-0.109697	-0.151703	-0.00192897	0.0854735
-931	-1005	-826.5	78.5		3.051	0.821	2.641	0.006	0.113	0.064	0.551	16.017	1287	942	485	50	350	8	17	55	3	77	5	38	9	194	3	3	56.8356	-0.0345928	-0.0235483	-0.0699271	0.262348
-998.5	-1071.5	-895	80.5		2.951	0.785	2.683	0.003	0.108	0.059	0.533	15.487	1231	905	438	53	343	8	16	44	4	71.7	5	35	0	177	3	2	55.5366	-0.0939864	-0.0518635	-0.0614964	0.181067
-1126.5	-1199.5	-1029	84.5		3.21	0.836	3.135	0	0.109	0.059	0.584	13.068	1425	1022	450	53	367	11	19	54	4	82.1	5	38	2	168	4	2	58.4098	-0.0567926	0.0741155	0.0680594	0.160665		14.4283	0.0509081	7.41158	5.56527	0.349719	14	16.5	19.5	50	0
-1248	-1322	-1159	88.5		2.939	0.776	2.814	0.009	0.11	0.069	0.555	15.227	1266	864	421	50	344	10	18	52	3	73.5	5	35	2	184	3	1	54.7478	-0.0773755	-0.00608685	-0.0871408	0.185717
-1306.5	-1383.5	-1222.5	90.5		3.257	0.85	2.986	0.004	0.117	0.061	0.625	16.677	1513	941	439	56	394	10	18	63	3	74	5	38	0	153	4	1	58.1262	-0.0412926	0.159018	-0.0933168	0.187729
-1364	-1447	-1285.5	92.5		3	0.721	2.669	0.008	0.107	0.061	0.574	14.95	1225	802	427	53	324	9	20	172	3	66.8	4	31	1	148	4	1	54.2254	0.00378235	0.0864039	-0.0205807	0.026071
-1420	-1512	-1346.5	94.5		3.24	0.803	2.81	0.004	0.113	0.065	0.699	16.025	1406	905	437	50	371	15	20	65	3	71.3	5	36	1	158	2	2	54.3274	-0.058858	0.179251	-0.14709	0.140175
-1475.5	-1577	-1407	96.5		2.893	0.676	2.396	0.005	0.106	0.085	0.491	16.077	1085	918	410	47	304	6	16	43	3	66.1	5	31	10	163	2	0	51.8519	-0.0992862	-0.121243	-0.141965	0.100333
-1584.5	-1707	-1523	100.5		3.086	0.746	2.728	0	0.108	0.063	0.5	13.436	1119	941	418	49	338	7	18	43	3	70.4	4	33	0	176	3	0	55.7087	-0.0974443	-0.0431249	-0.00563736	0.100378
-1691.5	-1836	-1634.5	104.5	C14 Macro ( 3386 +/- 30)	2.785	0.656	2.099	0.012	0.107	0.067	0.498	15.626	879	801	430	40	290	6	18	34	2	67.3	5	29	1	108	2	0	52.818	-0.125046	-0.0741093	-0.110665	-0.104192
-1798.5	-1967.5	-1732.5	108.5		2.929	0.678	2.316	0.006	0.105	0.063	0.513	15.365	1040	810	413	44	298	7	18	40	3	74	5	29	1	127	3	0	52.4038	-0.127693	-0.0552096	-0.0850805	-0.04223				23.4065
-1905.5	-2098	-1822.5	112.5		3.203	0.737	2.614	0	0.106	0.053	0.576	12.904	1187	890	431	48	323	8	20	46	3	81.5	5	31	0	138	3	0	57.1717	-0.100787	0.0288232	0.0803193	-0.0361615
-2012.5	-2229	-1912	116.5		3.371	0.833	2.814	0.006	0.105	0.059	0.658	14.385	1481	969	452	58	343	11	21	55	2	84.4	5	32	0	133	4	0	57.5045	-0.0680263	0.165065	0.0701164	-0.0121324
-2066	-2294.5	-1956	118.5		3.347	0.794	2.717	0.005	0.113	0.066	0.638	15.767	1417	934	458	49	368	9	21	54	3	86.6	6	34	0	126	5	0	59.5668	-0.0579846	0.171812	-0.0061165	0.0197281
-2119.5	-2360	-2000	120.5		3.045	0.703	2.536	0.008	0.106	0.061	0.5	15.385	1209	792	432	51	310	7	20	46	3	83.8	6	30	5	142	4	0	52.5114	-0.0930472	-0.00992793	-0.0384813	0.00262187	1.94378	14.6046	0.0542316	19.1162	5.51729	0.34652	92.6606	0.458716	2.29358	4.58716	0
-2173	-2425.5	-2044.5	122.5		3.728	0.933	2.889	0	0.113	0.055	0.593	13.151	1804	978	488	63	429	10	23	70	4	97.8	6	38	0	154	5	1	61.5238	0.0143853	0.292151	0.181054	0.0835246
-2226.5	-2490.5	-2088	124.5		3.402	0.813	2.845	0	0.105	0.048	0.543	12.198	1408	926	460	63	349	11	20	37	3	89.9	5	33	0	147	5	0	57.9525	-0.0737365	0.0641915	0.19586	0.00831488
-2280	-2556.5	-2132	126.5		3.824	1.004	3.506	0	0.113	0.064	0.705	11.869	2035	1169	475	72	454	12	26	69	3	113.5	5	41	0	174	6	2	64.0927	0.039807	0.401858	0.294194	0.161102
-2333.5	-2622.5	-2176.5	128.5		3.83	0.977	3.973	0.007	0.112	0.075	0.753	12.064	2164	1130	526	82	428	12	29	78	4	108.7	6	43	10	204	6	4	58.88	0.0783331	0.436472	0.237329	0.244972				13.8272
-2387	-2688	-2220.5	130.5		3.358	0.829	3.123	0	0.109	0.055	0.534	12.762	1440	937	457	62	390	13	21	44	3	80.1	5	33	0	137	5	0	60.5108	-0.0468335	0.147313	0.154947	-0.0118583
-2440.5	-2755	-2264	132.5		3.628	0.865	3.229	0	0.108	0.059	0.664	13.359	1668	967	482	65	373	14	24	47	3	85.3	5	33	0	132	5	2	57.3394	-0.0412143	0.290245	0.109777	-0.0327814				16.2328
-2494.5	-2820.5	-2308	134.5		3.327	0.773	2.758	0.003	0.111	0.06	0.589	14.745	1393	900	478	55	354	9	22	45	3	83	5	32	0	126	4	0	57.7821	-0.0631491	0.151083	0.0391803	-0.0414847
-2547.5	-2886.5	-2352	136.5		3.026	0.736	2.501	0.01	0.104	0.075	0.554	15.027	1282	903	474	53	316	8	19	51	3	75.6	5	28	1	119	4	0	52.9637	-0.0800629	0.0451789	-0.0176288	-0.08437				17.0862
-2654.5	-3020.5	-2440	140.5		2.75	0.706	2.186	0.009	0.104	0.068	0.541	15.839	1108	995	478	44	300	8	19	32	2	81.3	5	27	4	93	4	0	52.3156	-0.101815	-0.00219155	-0.0572796	-0.147252
-2761.5	-3154.5	-2528	144.5		2.647	0.647	1.946	0.005	0.103	0.063	0.471	15.728	951	1091	425	42	276	6	19	23	3	79	6	24	0	93	3	0	51.3344	-0.146087	-0.0806871	-0.0680016	-0.204516		14.5733	0.0509449	24.356	5.63168	0.345683	81.4016	0.269542	5.12129	12.938	0.269542
-2868.5	-3288	-2615	148.5		2.733	0.683	2.049	0.013	0.106	0.068	0.539	16.032	1158	927	464	44	286	9	21	22	3	83	6	26	0	99	3	0	53.1915	-0.120948	0.00356273	-0.0565846	-0.182717
-2975.5	-3423	-2703	152.5		2.918	0.712	2.108	0.002	0.103	0.065	0.547	14.84	1331	1002	439	45	294	8	23	41	2	84.9	5	27	3	108	4	0	54.7529	-0.106366	0.0604959	0.00974121	-0.184796
-3082.5	-3558	-2791	156.5		2.79	0.674	2.047	0.001	0.102	0.058	0.533	15.361	1242	792	428	48	289	8	21	31	2	79	5	27	3	129	3	0	52.2727	-0.133106	-0.0253989	-0.048531	-0.111046				21.8411
-3189.5	-3692	-2879	160.5		2.973	0.715	2.334	0.01	0.1	0.064	0.574	15.173	1423	790	425	50	297	10	22	38	2	77.6	5	26	0	99	4	0	52.7174	-0.125031	0.0947924	-0.0317057	-0.197601
-3296.5	-3826	-2966	164.5		2.79	0.696	2.009	0.015	0.1	0.073	0.582	15.455	1311	1046	432	43	278	7	21	34	2	69.1	5	24	0	92	3	0	52.8014	-0.133131	0.051992	-0.0765347	-0.249958
-3403.5	-3962	-3054	168.5		2.919	0.763	2.174	0.012	0.101	0.07	0.621	15.295	1455	1453	448	46	299	9	23	33	2	80.6	5	27	0	92	4	0	55.7756	-0.11196	0.132865	-0.00594436	-0.222535				18.6293
-3510.5	-4097	-3142	172.5		2.811	0.758	2.04	0.022	0.106	0.068	0.579	16.94	1385	835	477	42	297	10	24	19	3	78.2	5	26	0	91	3	0	54.5299	-0.106562	0.140222	-0.1056	-0.235875
-3617.5	-4233	-3229	176.5		2.976	0.757	2.154	0.018	0.103	0.068	0.546	15.1	1607	773	484	46	304	10	24	40	2	73.8	5	26	0	95	4	0	56.2613	-0.08997	0.153913	-0.00531436	-0.263656
-3724.5	-4368.5	-3317	180.5		2.714	0.694	1.972	0.021	0.102	0.057	0.487	15.392	1338	679	462	43	282	7	23	16	2	59.9	5	24	0	103	3	0	53.4247	-0.135484	0.0454706	-0.0946348	-0.278563		12.8472	0.0544935	20.6492	5.79499	0.349396	34.9558	14.1593	18.5841	32.3009	0
-3778.5	-4435.5	-3361	182.5		3.244	0.753	2.443	0.002	0.109	0.059	0.548	14.215	1841	729	483	58	326	8	25	38	3	65.5	4	25	0	72	5	0	61.5646	-0.0743881	0.235842	0.11063	-0.357668				17.5058
-4099.5	-4842	-3624	194.5		3.486	0.767	2.678	0	0.109	0.067	0.547	12.316	1990	810	476	60	338	9	27	60	2	75.5	4	28	0	80	7	1	63.7444	-0.0424759	0.287481	0.229095	-0.336626				13.8714
-4420.5	-5247	-3887	206.5		2.918	0.678	2.366	0.004	0.106	0.071	0.465	14.9	1793	662	448	49	303	7	26	46	2	66.9	4	23	0	81	5	0	57.4775	-0.0995524	0.169574	0.00629426	-0.360678				21.5284
-4741.5	-5654	-4150	218.5		2.223	0.591	2.107	0.028	0.109	0.097	0.452	16.256	1595	535	425	44	269	5	21	27	1	57.1	5	21	1	66	2	0	53.9394	-0.12139	-0.000616783	-0.121147	-0.357039		10.5689	0.0502558	27.361	6.28825	0.350539	80.0948	4.2654	6.16114	7.58294	1.89573
-5062.5	-6060.5	-4413	230.5		2.311	0.633	2.229	0.031	0.113	0.096	0.614	18.963	2214	482	421	44	282	9	24	50	2	60.1	5	22	0	71	4	0	51.4235	-0.110381	0.210076	-0.289871	-0.302335				29.4663
-5383.5	-6466	-4675	242.5		2.565	0.701	2.342	0.032	0.114	0.088	0.562	16.612	2554	620	449	47	302	9	26	48	2	59.5	5	25	0	87	4	0	54.2986	-0.082692	0.274568	-0.174035	-0.302744				21.6334
-5704.5	-6872	-4938	254.5		1.839	0.559	1.927	0.073	0.115	0.116	0.519	21.702	1605	347	437	32	249	6	18	34	1	43.1	6	23	9	86	2	0	42.1394	-0.103851	-0.00872177	-0.581292	-0.159084		8.53761	0.0427842	39.4561	6.50015	0.352349	87.5	1.17188	7.03125	4.29688	0

## Sheet: Fickeln
Info					Majors								Minors																		PCA					lake-water conc.	sediment conc.		Diatoms, pH							Pollen
AD, mid sample	2σ range		cm, mid sample		(%)	(%)	(%)	(%)	(%)	(%)	(%)	(%)	(ppm)	(ppm)	(ppm)	(ppm)	(ppm)	(ppm)	(ppm)	(ppm)	(ppm)	(ppm)	(ppm)	(ppm)	(ppm)	(ppm)	(ppm)	(ppm)	(ppm)	(%)						(mg L-1)	(mg g-1)	(%)	WA, Inverse, SWAP		(%)	(%)	(%)	(%)	(%)	counts	counts
age	age_min	age_max	depth	Notes	Al	Ca	Fe	K	Mg	Na	S	Si	P	Cl	Ti	V	Mn	Co	Cu	Zn	Ga	Br	Rb	Sr	Zr	Ni	Ba	W	Pb	LOI	PC1	PC2	PC3	PC4	206Pb/207Pb	LW.TOC	Chl	bSi	pH	pH.SSE	Planktonic	Tychoplanktonic	Attached	Epipelic	Unknown	Terrestrial plants	All - aquatic spores terrestrial	Trees	Broadleaves
2004.5	2000.5	2010.5	1.5	passive PCA sample	1.991	0.696	7.734	0.134	0.117	0.16	1.078	8.977	1903	1144	615	70	470	38	25	142	5	81.7	11	23	22	7	177	3	71	65.3789	-0.175947	0.479318	-0.0791785	-0.107853		13.7543	0.0563374	5.44028	5.78838	0.344651	16.5354	21.2598	31.1024	30.315	0.787402	493	611	83.57	0
1997	1989.5	2009.5	3.5	passive PCA sample	2.095	0.73	6.867	0.207	0.129	0.235	1.125	10.5	1807	901	766	70	442	32	28	154	5	60.9	12	21	8	7	83	3	66	63.0314	0.00179312	0.291302	-0.326212	0.0781898		12.7125	0.0532292	4.89176
1989	1978	2009	5.5	passive PCA sample	2.178	0.708	6.571	0.246	0.14	0.259	1.062	11.45	1759	734	867	69	423	31	26	142	7	60.7	15	29	41	6	183	4	78	56.0201	0.145853	0.267202	-0.0862611	-0.0719085
1980.5	1966	2007.5	7.5	passive PCA sample	1.994	3.128	6.02	0.223	0.207	0.258	1.102	11.189	1781	686	815	57	445	24	21	147	5	48.8	12	26	23	6	96	4	66	53.2526	0.228274	-0.046868	-0.0764609	0.361678		9.96203	0.0514991	4.80424
1972	1954	2005.5	9.5		1.811	0.582	7.435	0.08	0.106	0.109	2.136	9.213	2747	736	555	65	381	39	34	213	5	62.9	8	21	18	8	164	4	98	64.5749	-0.218122	0.522507	-0.376911	0.34593	1.16293				5.57425	0.344042	8.89831	15.678	44.0678	31.3559	0	481	605	83.5759	0.4158
1963	1941	2003.5	11.5		1.374	0.376	9.171	0.12	0.104	0.182	2.576	7.231	3963	808	611	67	255	40	45	157	6	54.6	8	23	34	8	233	5	118							13.403	0.0712509	5.77217
1953.5	1928.5	2000	13.5		2.26	0.537	6.671	0.192	0.123	0.183	1.942	9.858	3016	788	1507	74	344	30	41	198	9	45.7	15	26	39	6	208	4	94
1943	1915	1996	15.5		2.833	0.783	5.617	0.402	0.19	0.403	1.011	10.771	2748	667	1128	63	387	24	28	170	9	37	24	41	79	6	264	5	116	47.8417	0.537398	0.200104	0.0598063	0.234925		8.97622	0.0463234	3.23051
1932	1901.5	1990.5	17.5		2.753	0.829	4.891	0.38	0.2	0.446	0.757	10.518	2342	556	1135	56	389	20	23	158	9	29.6	23	41	76	4	251	6	91	47.0779	0.602774	0.096454	0.010922	0.143002												447	1175	73.8255	0.223714
1920	1886.5	1984	19.5		3.15	0.914	5.285	0.563	0.25	0.677	0.657	12.226	2319	443	1360	54	382	20	20	127	10	24.9	28	47	97	4	312	5	64	39.3475	0.96	-0.0685389	0.240677	0.0117224		7.75845	0.0378514	1.39174
1906.5	1871	1976	21.5		2.556	0.767	6.904	0.35	0.188	0.387	0.671	12.621	2107	495	1041	63	401	29	23	143	9	36	22	39	84	5	277	6	93	46.225	0.4917	0.200841	0.106434	-0.0853643					5.69268	0.344665	2.46305	25.1232	33.9901	38.4236	0	438	1209	70.5479	1.14155
1892.5	1854.5	1966	23.5		2.508	0.85	6.486	0.31	0.166	0.357	0.629	11.575	2340	605	1032	69	405	27	22	124	7	33.4	17	33	45	3	158	5	91	50.6066	0.378893	0.186656	-0.0781833	-0.0179365	1.10248	8.85363	0.0386658	4.68461
1877.5	1837.5	1954	25.5		2.871	0.931	5.124	0.444	0.224	0.606	0.425	13.374	2126	457	1259	58	414	21	19	114	9	28	23	42	77	4	219	5	80	44.8855	0.769377	-0.0287203	0.0773482	-0.0782025
1861	1819.5	1941.5	27.5		2.713	0.745	4.561	0.499	0.194	0.698	0.377	15.13	1809	476	1335	51	341	17	14	76	7	26.4	23	40	73	3	193	3	49	41.1661	0.864021	-0.223569	-0.0593132	-0.235848	1.1404	8.94829	0.0360725	4.06079
1843	1801	1926	29.5																																											490	1152	70.2041	0.816327
1824	1780	1908.5	31.5		2.096	0.812	9.306	0.151	0.135	0.216	0.578	11.356	4065	766	758	60	487	42	24	122	6	55.5	11	32	40	6	190	6	99	60.1027	-0.0528314	0.624156	-0.0444135	0.00618551					5.82274	0.344917	11.9048	24.7619	41.9048	20.9524	0.47619
1802.5	1758.5	1889	33.5		1.884	0.71	8.135	0.097	0.119	0.121	0.479	11.165	3700	675	647	48	476	43	23	151	6	50.7	9	27	26	5	191	6	92	58.8933	-0.107086	0.568551	-0.279169	0.0884136	1.13941	11.7693	0.045657	7.50025
1755.5	1712	1841.5	37.5		2.087	0.982	10.1	0.183	0.177	0.219	0.449	8.703	4023	534	752	51	700	46	28	143	8	39.2	16	37	43	6	224	7	71	54.6112	0.0279166	0.771669	0.0364113	0.0791877		10.805	0.0437217	2.74542	5.85964	0.344854	9.52381	23.8095	32.381	31.9048	2.38095	508	1516	75.5906	0.984252
1700.5	1659	1783	41.5		1.869	1.01	7.458	0.153	0.165	0.143	0.394	11.556	3366	613	610	44	549	36	19	119	6	43	16	29	23	4	199	7	78	55.1595	0.0110683	0.489002	-0.189884	-0.0402035	1.1378	11.8907	0.0429171	4.52801	5.94996	0.346287	7.76699	24.2718	34.466	32.5243	0.970874	509	1460	79.9607	0
1637.5	1602	1712.5	45.5		1.987	1.114	6.336	0.163	0.163	0.152	0.39	13.307	3156	661	669	47	524	34	17	106	6	44.5	14	30	19	5	198	5	61	54.4519	0.0699433	0.348552	-0.12726	-0.116122	1.14125	11.4103	0.0420343	7.41006	6.01678	0.345585	21.6312	26.2411	31.2057	12.766	8.15603	501	1697	81.2375	0.399202
1602	1570.5	1672.5	47.5		2.231	1.599	6.282	0.253	0.21	0.172	0.4	13.347	3437	678	748	49	719	37	20	122	8	43.3	18	36	18	5	211	5	60																	463	832	79.0497	0.215983
1565	1535	1628.5	49.5	C14 bulk (500 +/- 30)	2.126	1.271	5.999	0.156	0.177	0.151	0.428	9.932	3801	789	663	58	574	36	26	102	8	46.7	15	36	21	5	347	4	63	59.4646	-0.0249413	0.554188	0.299908	0.0335341		12.2044	0.0468656	3.18871	5.94362	0.346817	11.0048	25.8373	29.6651	30.1435	3.34928	506	2116	86.166	0.395257
1525	1497	1581	51.5		2.142	1.072	4.84	0.159	0.135	0.147	0.465	12.942	3686	814	716	60	532	33	33	121	8	44.4	12	29	8	7	235	4	63	61.753	-0.0494607	0.391767	-0.0674058	0.254844												465	1807	81.9355	1.29032
1482.5	1454.5	1532.5	53.5		1.955	0.82	4.356	0.093	0.113	0.122	0.44	12.961	2981	981	688	60	411	18	31	93	8	52.7	9	26	8	5	227	3	91	61.4063	-0.0852393	0.288822	-0.185571	0.171661	1.06721	13.0647	0.0533939	5.01919	5.85675	0.346998	9.77778	14.6667	31.5556	40.8889	3.11111	436	809	87.156	0
1437.5	1409	1479.5	55.5		1.836	0.856	3.722	0.087	0.107	0.104	0.505	13.791	2692	1167	670	54	405	10	27	94	8	56.4	9	23	3	7	176	3	91	64.1975	-0.108905	0.220097	-0.331371	0.116869												604	1056	90.2318	1.15894
1389.5	1359	1427	57.5		1.734	0.732	3.588	0.067	0.106	0.09	0.443	14.771	2159	1098	636	47	364	10	25	96	9	60.4	8	22	3	6	172	2	92	58.8561	-0.0543358	0.115991	-0.452448	0.0666078	1.0581	13.3854	0.0553396	12.0428	5.84549	0.346507	25.1142	17.3516	26.0274	31.5068	0	490	990	88.3673	0.816327
1339	1305	1378	59.5		1.609	0.762	2.686	0.063	0.104	0.079	0.434	16.638	1403	1185	685	45	354	0	18	53	7	59.6	8	18	0	5	90	1	57	59.9278	-0.024642	-0.0830471	-0.578898	-0.166949	1.14372											508	669	84.252	1.5748
1286	1250	1325.5	61.5	C14 bulk (956 +/- 30); Blast Furnace	1.437	0.625	2.73	0.07	0.103	0.103	0.43	14.438	1294	1424	689	41	297	1	17	41	8	74.5	9	21	13	6	131	2	53	60.1586	-0.0404504	-0.06428	-0.504142	-0.210962	1.14964	13.7913	0.0534402	17.5338	5.66293	0.344225	5.7971	20.2899	41.6667	32.2464	0	486	594	89.0947	1.02881
1230	1192	1270	63.5		1.296	0.678	2.207	0.056	0.097	0.09	0.448	15.72	1233	1442	645	31	304	0	15	33	7	74.1	8	18	3	6	85	2	24						1.20987											592	653	83.1081	1.18243
1172	1132.5	1213	65.5		1.326	0.601	2.375	0.041	0.098	0.084	0.45	15.201	1334	1413	607	32	268	0	17	30	7	76.1	8	17	2	6	93	1	27						1.21068	13.7277	0.0521242	13.6972								523	579	84.7036	2.10325
1110.5	1068	1152	67.5	Cereals	1.559	0.755	2.464	0.046	0.105	0.117	0.503	16.532	1827	1384	654	44	304	0	19	44	8	79.9	7	24	35	8	168	3	29	62.9752	-0.0782684	-0.0625177	-0.346498	-0.196417	1.23401				5.54433	0.344705	4.5	8.5	31.5	54.5	1	522	567	80.0766	2.29885
1048	1005.5	1089	69.5		1.628	0.732	2.594	0.045	0.101	0.107	0.436	16.124	1862	1099	667	53	296	0	18	42	8	67.5	7	22	14	6	156	3	12	58.3955	-0.0493704	-0.0787171	-0.328772	-0.234238	1.29558	14.8244	0.0486836	15.1266								464	543	80.819	2.80172
984	937.5	1022.5	71.5	C14 macro (1744 +/- 75); Contineltal Pb	1.668	0.819	2.494	0.036	0.102	0.102	0.456	16.335	1867	1114	618	57	305	0	17	26	8	70.9	6	25	18	6	192	1	8	62.4811	-0.0976292	-0.0471494	-0.152942	-0.329302	1.34837											466	548	84.7639	1.50215
918.5	871	955.5	73.5	C14 macro (1150 +/- 45)	1.601	0.776	2.58	0.027	0.097	0.08	0.454	14.97	1752	1080	608	61	292	0	20	29	7	68.8	6	23	8	6	162	1	2						1.49611	15.6563	0.0478231	15.5116	5.38112	0.344033	0.306748	7.36196	35.2761	53.9877	3.06748	473	527	80.7611	2.32558
851.5	806	886.5	75.5		1.637	0.843	2.4	0.021	0.1	0.092	0.469	15.71	1753	1198	585	61	297	0	18	22	8	72.5	6	25	13	7	191	2	2	62.6324	-0.127365	-0.0506521	-0.120707	-0.325427												442	536	85.7466	2.0362
784	744	816	77.5		1.792	0.867	2.718	0.033	0.103	0.09	0.505	14.493	1909	1165	636	63	305	2	20	33	9	75.5	7	28	14	6	206	2	3	60.7495	-0.0971389	-0.0194007	-0.0435123	-0.246664	1.54554	14.7906	0.0491146	13.4684	5.48017	0.344555	2.9661	8.47458	29.661	58.0508	0.847458	491	523	74.7454	3.86965
715	678.5	747.5	79.5		1.971	1.083	2.861	0.021	0.109	0.073	0.622	12.828	2302	1561	671	74	340	3	28	45	11	89.8	6	31	18	8	231	3	5	69.9237	-0.219695	0.104559	0.179737	-0.0700815												487	544	82.3409	1.64271
645.5	610	679.5	81.5	C14 bulk (1652 +/- 30)	1.804	0.948	2.785	0.015	0.102	0.076	0.532	11.453	1938	1427	575	68	312	3	20	21	9	82.8	6	28	23	7	228	3	2	66.4452	-0.205454	0.0713323	0.0889843	-0.235345				8.47084								604	658	83.2781	4.13907
575	539.5	610.5	83.5		2.197	1.154	3.277	0.013	0.104	0.076	0.633	10.902	2697	1589	604	95	345	10	28	39	11	91.5	6	33	16	8	268	4	5	72.6073	-0.309246	0.242499	0.490979	-0.146788												499	548	83.5671	1.40281
503	466.5	542	85.5	C14 macro (1615 +/- 45)	2.397	1.158	3.001	0.015	0.101	0.078	0.579	12.165	2805	1291	592	91	322	5	26	26	10	76	5	29	6	6	243	3	2						1.53453	15.0307	0.0589748	12.5915	5.40165	0.344089	0	16.9903	44.6602	34.9515	3.39806	477	527	84.696	0.838574
430.5	392	473.5	87.5		1.842	0.88	2.296	0.004	0.1	0.086	0.555	18.379	1797	880	487	67	260	2	18	17	6	64.5	5	21	4	19	148	1	1	59.4976	-0.0946705	-0.170597	-0.222896	-0.279333												461	547	76.3557	1.30152
356.5	315	403	89.5		1.633	0.76	2.055	0.013	0.099	0.082	0.473	18.118	1459	802	499	54	240	0	14	33	5	60.1	5	19	0	11	108	1	0	53.7477	-0.0162064	-0.249283	-0.467453	-0.284732				18.3857								429	493	80.1865	3.0303
281.5	237	330.5	91.5		2.427	1.271	3.108	0.013	0.109	0.087	0.652	13.521	2675	1172	638	82	325	6	22	40	10	93.6	6	37	20	9	322	4	8	67.1576	-0.169997	0.123106	0.540054	-0.221606
206	159	255.5	93.5		2.049	1.085	2.787	0.016	0.102	0.077	0.515	12.474	1954	1151	597	70	295	4	17	41	9	80.9	6	30	15	6	243	3	6	63.2576	-0.132145	0.0226995	0.163875	-0.255341	1.43284	14.6803	0.0509565	11.0861	5.43074	0.344353	3.53982	7.52212	28.3186	59.7345	0.884956	615	664	85.3659	1.13821
129.5	78.5	179	95.5		2.163	1.189	2.867	0.027	0.109	0.096	0.596	13.297	2073	1261	650	76	299	4	21	27	10	85.1	6	35	23	7	270	2	7	68.2657	-0.142453	0.038678	0.346367	-0.241652
52.5	0.5	101.5	97.5		2.081	1.134	2.71	0.018	0.105	0.078	0.516	13.397	1846	1074	587	71	287	2	19	17	9	78.9	6	31	13	7	238	3	4	55.0877	-0.0541194	-0.0755587	0.147044	-0.228009				14.4749
-25.5	-79	23.5	99.5		2.1	1.183	2.569	0.02	0.107	0.089	0.563	13.776	1889	1159	606	74	277	2	21	22	8	84.4	6	32	19	7	250	2	5	66.9691	-0.141034	-0.0295118	0.239378	-0.213224												623	657	82.9856	2.24719
-103.5	-161.5	-56	101.5		2.028	1.106	2.576	0.013	0.103	0.084	0.505	14.02	1757	977	545	69	268	1	19	30	9	72.8	5	28	9	7	218	3	5	61.1111	-0.0944182	-0.0851917	0.0422526	-0.186205	1.39163	15.5175	0.0471549	12.7644
-182	-241.5	-136	103.5		1.932	1.131	2.352	0.02	0.107	0.089	0.537	18.707	1704	966	545	67	257	0	20	23	8	73	6	29	10	7	206	2	7	60.4356	-0.0566457	-0.177272	-0.00151718	-0.263967
-221.5	-281.5	-176	104.5		2.046	1.317	2.604	0.019	0.103	0.076	0.544	16.777	1918	1002	567	75	271	1	19	27	8	74.9	5	29	8	8	205	3	9						1.34423				5.49166	0.343993	2.41546	8.69565	32.8502	54.1063	1.93237	594	627	86.3636	2.6936
-261	-322.5	-215.5	105.5	Roman Pb	2.292	1.305	3.024	0.007	0.107	0.07	0.583	11.52	2155	1115	575	85	290	7	25	33	10	90	6	37	20	9	311	2	14	65.692	-0.178738	0.0837934	0.497141	-0.134041	1.33003			9.25456
-300.5	-364	-254.5	106.5		2.214	1.367	2.542	0.009	0.103	0.065	0.539	13.338	1990	1025	563	84	260	1	21	19	7	69	5	27	0	6	195	3	7						1.33279
-340	-405.5	-293.5	107.5		2.249	1.271	2.586	0	0.106	0.079	0.558	16.225	2062	1012	543	74	268	0	23	26	8	79.5	5	33	17	9	259	4	9	62.3563	-0.0959291	-0.0967599	0.224742	-0.137292
-379.5	-446.5	-333.5	108.5		2.177	1.256	2.436	0.009	0.102	0.073	0.52	17.859	2042	943	550	70	251	0	21	27	7	71.7	5	28	8	7	209	3	7	59.5563	-0.0600389	-0.180017	0.0243643	-0.131297
-419	-488	-372.5	109.5	C14 bulk (2361 +/- 30)	2.072	1.081	2.346	0	0.102	0.063	0.474	16.396	1798	877	487	66	242	0	21	36	7	73.6	4	29	7	7	210	3	8	54.1667	-0.034068	-0.184352	-0.0485096	-0.113659	1.32486	15.1534	0.0480429	19.6939								586	601	82.5939	2.04778
-498.5	-571.5	-446.5	111.5		2.217	1.255	2.471	0	0.105	0.066	0.546	15.331	2007	1031	525	68	249	1	19	35	7	79.7	4	32	20	8	247	3	10	63.0573	-0.094909	-0.106237	0.150721	-0.145171	1.31272
-577.5	-657	-518	113.5		2.271	1.309	2.762	0.008	0.106	0.064	0.543	14.259	2022	1043	571	74	257	2	20	33	8	87.1	5	36	26	10	297	4	4	60.9312	-0.0905106	-0.0566063	0.359355	-0.199671				13.8086
-617	-701	-553.5	114.5		2.471	1.542	2.84	0.015	0.106	0.077	0.574	13.041	2337	1150	614	76	266	4	23	32	8	80.1	4	33	27	9	260	3	3	66.4495	-0.116999	-0.0637801	0.307019	0.0222058					5.47711	0.344149	2.86885	7.37705	33.6066	56.1475	0
-657	-746	-589	115.5		2.12	1.177	2.572	0	0.105	0.063	0.531	14.614	1867	1039	513	63	249	2	20	27	7	78.4	5	30	19	9	248	3	1						1.48588
-696.5	-791.5	-624.5	116.5		2.232	1.328	2.622	0.019	0.108	0.079	0.57	16.164	2025	1103	557	68	252	0	20	31	8	79.9	5	30	13	9	226	3	0	62.6298	-0.0765857	-0.150212	0.107151	-0.115985
-736	-836.5	-660	117.5		2.136	1.341	2.385	0.027	0.108	0.087	0.607	16.962	1931	1114	583	67	244	0	20	39	7	74.2	6	29	10	9	210	3	1	62.0209	-0.0515602	-0.183137	0.0378206	-0.116015		19.1807	0.0544136	14.0855
-775.5	-882	-695.5	118.5		2.088	1.241	2.493	0.02	0.104	0.072	0.586	14.637	1793	1154	569	69	236	1	22	30	6	75.9	5	29	11	9	247	3	2
-815	-928	-731	119.5	Spruce	2.036	1.107	2.301	0.018	0.104	0.073	0.524	14.418	1616	1040	562	62	226	0	17	27	6	69.2	6	27	5	8	196	3	0	59.0698	-0.0349481	-0.192412	-0.0846193	-0.140084	1.52894											699	726	86.123	2.86123
-855	-973.5	-767	120.5		2.04	1.165	2.203	0.029	0.107	0.089	0.53	17.575	1728	998	567	58	220	0	16	30	6	65.9	5	25	6	7	154	3	0	60.9215	-0.00964755	-0.266385	-0.207969	-0.141823
-894.5	-1019	-802.5	121.5		2.189	1.303	2.389	0.018	0.106	0.075	0.577	16.935	2000	1155	546	65	238	0	19	30	7	81.4	5	31	11	8	218	3	0	62.5239	-0.0673056	-0.183301	0.0732893	-0.136154
-934	-1065	-837.5	122.5		2.264	1.277	2.367	0.019	0.108	0.073	0.559	14.653	1969	1192	567	62	233	0	20	34	7	81.2	5	30	10	9	204	3	0	63.7478	-0.0650821	-0.1828	0.00632282	-0.00583548
-973.5	-1110.5	-872.5	123.5		2.151	1.132	2.301	0.017	0.108	0.071	0.522	13.884	1736	1049	564	56	223	0	17	22	7	75.5	6	28	2	8	188	3	0	60.2694	-0.0263718	-0.2167	-0.117701	-0.052388
-1132	-1291.5	-1013.5	127.5		2.17	1.178	2.367	0.013	0.108	0.069	0.554	15.652	1789	1090	548	58	218	0	19	33	7	73.4	5	29	6	10	188	2	0	58.784	-0.00944347	-0.242299	-0.114841	-0.0283214	1.61744											521	546	81.382	4.22265
-1290.5	-1471	-1152.5	131.5		2.367	1.342	2.605	0.006	0.111	0.065	0.604	12.94	2076	1440	553	64	223	0	30	39	8	82.7	5	34	10	8	224	3	1	62.4441	-0.0647956	-0.181884	0.04012	0.293288		15.3785	0.0569123	15.2556
-1449	-1655	-1293	135.5		2.329	1.316	2.542	0.04	0.12	0.113	0.65	13.596	1939	1312	665	67	221	2	25	34	8	78.1	6	37	28	9	269	3	2	63.5593	-0.00220681	-0.154304	0.215648	0.0487588
-1607	-1839	-1434.5	139.5		2.269	1.324	2.351	0.008	0.108	0.067	0.569	12.103	1855	1362	529	62	205	0	26	33	6	75.3	5	31	5	10	223	3	0	64.1766	-0.075571	-0.193135	-0.00850391	0.225441
-1765.5	-2023	-1574.5	143.5		2.459	1.467	2.657	0.002	0.112	0.058	0.645	12.686	2317	1290	538	74	216	2	30	33	8	83.6	5	36	14	11	257	5	0						1.76837			11.4719	5.36537	0.344502	1.88679	7.54717	33.4906	57.0755	0
-1924	-2204.5	-1714	147.5		2.595	1.438	2.669	0	0.11	0.059	0.682	13.127	2621	1247	522	74	204	5	34	47	7	86	5	38	28	14	300	3	0	63.6656	-0.100519	-0.117769	0.293807	0.3659
-2241	-2568	-1993.5	155.5		2.569	1.334	2.39	0.002	0.111	0.07	0.568	13.382	2436	1037	523	67	189	1	32	170	8	80.1	5	35	15	9	272	3	0									10.882
-2399.5	-2750	-2133.5	159.5		2.642	1.445	2.546	0.027	0.116	0.088	0.655	11.743	2504	1228	652	72	195	3	36	40	7	76.1	6	39	21	11	312	3	1	63.9706	-0.027445	-0.146467	0.288576	0.45506
-2558	-2932.5	-2273.5	163.5		2.563	1.431	2.402	0.029	0.114	0.095	0.611	11.985	2349	1123	609	74	189	1	30	33	7	73.5	6	36	17	9	258	3	0	65.416	-0.0446291	-0.165372	0.216483	0.308693
-2716	-3114.5	-2413.5	167.5		2.747	1.439	2.413	0.008	0.114	0.066	0.647	12.545	2703	1150	516	65	186	1	35	44	6	86.3	5	36	17	13	274	3	0	63.2411	-0.0570307	-0.202271	0.133495	0.55769
-2795.5	-3205.5	-2483.5	169.5		2.806	1.404	2.452	0.012	0.115	0.078	0.679	13.864	2924	1004	553	62	180	8	28	55	7	86.1	6	33	17	15	270	4	0	59.375	-0.00592203	-0.215563	0.0954647	0.420745	1.75672	14.4774	0.0549714	15.0693
-2954	-3387.5	-2623.5	173.5		2.24	1.015	1.59	0	0.094	0.053	0.473	9.125	1743	1031	367	50	144	0	20	20	2	48	4	18	0	4	148	0	0	66.1169	-0.0941025	-0.277338	-0.473471	0.38481
-3112	-3569.5	-2763.5	177.5		2.594	1.43	2.499	0	0.11	0.066	0.751	12.98	2732	1190	505	64	176	3	29	39	6	74.9	4	30	0	11	221	3	0	63.6641	-0.0733483	-0.2094	-0.0178382	0.449785
-3270.5	-3750.5	-2903.5	181.5		2.405	1.385	2.219	0	0.107	0.068	0.58	11.922	2606	1218	521	62	175	0	26	44	6	80.5	5	30	5	9	231	3	0	65.0621	-0.105925	-0.16666	0.00400379	0.345539				15.1206	5.33408	0.34434	2.94118	11.2745	28.9216	54.902	1.96078
-3429	-3931.5	-3043.5	185.5		2.334	1.354	2.141	0	0.108	0.061	0.59	13.6	2527	1275	492	55	170	0	26	33	7	93.6	5	30	4	11	245	3	0	63.2613	-0.103436	-0.214186	-0.0246846	0.308108
-3587.5	-4112.5	-3182.5	189.5		2.246	1.3	2.155	0	0.107	0.065	0.694	12.918	2556	1273	471	60	167	0	33	41	6	84.2	5	29	9	12	213	4	0									10.5163
-3904	-4474.5	-3462.5	197.5		2.363	1.332	2.206	0	0.107	0.064	0.721	13.38	2924	1254	449	60	168	0	42	37	5	81	4	29	6	12	244	3	0
-4221	-4838.5	-3742.5	205.5		2.167	1.293	2.083	0.001	0.107	0.07	0.679	14.92	2410	1086	467	60	164	0	34	35	5	77	5	27	1	12	214	3	0									16.2651
-4538	-5202.5	-4022.5	213.5		2.547	1.4	2.37	0	0.111	0.07	0.708	13.86	3323	940	496	68	176	2	38	38	5	72.8	5	28	0	12	216	4	0
-4696	-5384	-4162.5	217.5		2.574	1.453	2.438	0	0.11	0.07	0.793	13.149	3290	1150	478	72	177	3	43	52	6	79.2	5	33	10	13	291	4	0									11.9295
-5171.5	-5928.5	-4582.5	229.5		2.448	1.397	2.27	0.012	0.114	0.075	0.686	13.338	3033	1005	499	65	177	0	43	48	4	73.9	5	31	6	13	232	4	0	62.9758	-0.094154	-0.202665	-0.0882947	0.768753				11.4662
-5488.5	-6291	-4862.5	237.5		2.24	1.256	1.99	0.001	0.11	0.069	0.643	17.073	2444	846	426	54	163	0	50	30	3	72.8	4	25	0	11	157	3	0									17.1345
-5963.5	-6834.5	-5282.5	249.5		2.206	1.274	2.227	0.002	0.111	0.071	0.728	18.644	2425	807	406	53	166	0	32	32	3	65	4	26	0	11	148	3	0						1.79877	14.1213	0.0575319	20.5821	5.471	0.345044	0.97561	16.0976	23.4146	51.2195	8.29268
-6280.5	-7199	-5562.5	257.5		2.322	1.29	2.354	0.004	0.111	0.077	0.744	16.089	2952	801	421	61	167	4	29	39	3	64.5	4	26	0	10	185	3	0
[truncated: 70 more columns]

## Sheet: Diatom counts
Nomenclature based on SWAP
() means either no match in SWAP or it was deliberately left out, e.g. with (Navicula sp.), which has a high "optima", but here consists mainly of broken valves of the otherwise common and therefore mostly low-pH taxa.	Kramptjärnen	Kramptjärnen	Kramptjärnen	Kramptjärnen	Kramptjärnen	Kramptjärnen	Kramptjärnen	Kramptjärnen	Kramptjärnen	Kramptjärnen	Kramptjärnen	Kramptjärnen	Mosjökälla	Mosjökälla	Mosjökälla	Mosjökälla	Mosjökälla	Mosjökälla	Mosjökälla	Mosjökälla	Mosjökälla	Mosjökälla	Mosjökälla	Mosjökälla	Mosjökälla	Mosjökälla	Mosjökälla	Mosjökälla	Mosjökälla	Mosjökälla	Mosjökälla	Fickeln	Fickeln	Fickeln	Fickeln	Fickeln	Fickeln	Fickeln	Fickeln	Fickeln	Fickeln	Fickeln	Fickeln	Fickeln	Fickeln	Fickeln	Fickeln	Fickeln	Fickeln
Diatom taxa	1844.5	1534	1213.5	1019.5	535	255.5	-465	-1554.5	-3416	-4652	-6371	-8020	1990	1914.5	1764.5	1617.5	1339.5	1149.5	891.5	747.5	429.5	94	-241	-716.5	-1126.5	-2119.5	-2761.5	-3724.5	-4741.5	-5704.5	1976.5	2004.5	1972	1906.5	1824	1755.5	1700.5	1637.5	1565	1482.5	1389.5	1286	1110.5	918.5	784	503	206	-221.5	-617
Achnanthes altaica	5.36585	1	1.97044	0	0.483092	0.985222	0.485437	0	1.20968	4.39024	0	0.4329	0	0	0.5	0.485437	1.70213	0.921659	1.49254	0	1.76211	1.96078	0.970874	1.44231	1.5	0	0.269542	2.21239	0.947867	0.78125	4.85437	0.393701	5.08475	0.985222	1.42857	0	0.485437	1.06383	0.478469	0	0.456621	1.44928	0	1.22699	1.27119	0.970874	0.442478	1.44928	1.63934
Achnanthes levanderi	1.46341	1.5	0	0.657895	0.483092	0.985222	0	0.49505	0	0.487805	0	0	0	0	0.5	0.485437	0.425532	0	0	0	0.881057	0	0.970874	0	0	0	0	0.442478	0	0	0.970874	0.393701	2.11864	0.492611	1.42857	1.42857	1.45631	0.35461	2.39234	0.888889	0.456621	1.44928	1	0.613497	2.11864	0.485437	0.884956	0	0.409836
Achnanthes linearis	0	0	0	0	0.483092	0	0.485437	0	0	0.487805	0.434783	0	0	0	0	0	0	0	0	0	0	0	0	0	0	0	0	0.442478	0	0	0	0.393701	1.69492	0.985222	0.952381	1.90476	0	0.70922	0.478469	1.77778	0	2.17391	0.5	0.920245	1.27119	0.485437	1.32743	1.44928	2.45902
Achnanthes marginulata	1.46341	2	0.492611	0.328947	0	0	0	0	0.806452	0	0	0	0.49505	0.41841	0.5	0.485437	0.425532	1.38249	0	0	0	1.17647	0	0	0	0	0	1.76991	0	0	0	3.54331	0	1.47783	0.47619	0.47619	0.485437	0	0	1.33333	0	0.362319	2	0.306748	0	0.485437	1.76991	0	0.819672
Achnanthes minutissima	0.487805	2	0	0.328947	0	0	0	0	0.806452	2.43902	4.78261	2.1645	4.9505	8.3682	1	0.485437	2.55319	0.921659	0.497512	0.492611	1.76211	0.784314	0	0	0.5	0	0.539084	2.21239	2.36967	2.73438	0.970874	3.14961	5.08475	9.35961	6.19048	9.04762	7.76699	3.90071	3.82775	5.33333	1.82648	2.17391	3	1.53374	0.847458	5.82524	2.21239	0.966184	2.45902
Achnanthes pusilla var. pusilla	0	0	0	0	0	0	0	0.990099	0	0	0	0	0	0.41841	0	0	0	0	0	0	0	0	0	0	0	0	0	0	0	0	0	1.1811	0	0	2.38095	0	4.36893	2.12766	0	0	0	0	0	0	0	0	0	0	0
Achnanthes subatomoides	0.97561	0.5	0.492611	0	0	0	0	0	0	0	0	0	0	0	0	0	0	0	0	0	0	0	0	0	0	0	0	0	0	0	0.485437	1.1811	0.847458	0	3.33333	2.85714	0.970874	1.41844	1.43541	3.11111	2.73973	2.53623	1	0.306748	1.69492	1.94175	0.442478	1.93237	0.409836
(Achnanthes sp.)	2.92683	3	0.492611	3.61842	1.44928	0	1.45631	0	1.6129	0	0.869565	1.2987	0.49505	0.83682	0.5	0.485437	0	0	0	0	0	0.392157	0	1.44231	0	0	0	0.442478	0	0	2.91262	0	4.23729	0	3.80952	0.47619	0.970874	2.83688	0.478469	0.444444	0.913242	3.62319	0.5	1.84049	0	1.94175	0.442478	1.93237	0
Asterionella formosa var. formosa	0	0	0	0	0	0	0	0	0	0	0	0	0	0	0	0	0	0	0	0	0	0	0	0	0	0	0	0	0	0	0	0	0.423729	0	0	0	2.91262	13.8298	4.30622	7.55556	22.3744	0.362319	0	0	0.423729	0	0.442478	0	0
Aulacoseira distans	0	0.5	0	9.86842	0	4.92611	3.39806	1.9802	0	8.29268	6.52174	9.95671	2.47525	0	0	0	2.55319	0	0	0	0	0	0	0.480769	0	0	0	0.442478	0	0	5.82524	0	1.69492	0	3.33333	2.85714	1.94175	1.77305	4.30622	0	2.28311	1.44928	0	0.306748	0	3.39806	0	0.966184	0
Aulacoseira distans var. humilis	0	0	0	0	1.44928	0	0	0	0	0	0	10.8225	0	0	0	0	0	0	0	0	0	0	0	0	0	0	0	0	0	0	0	0	0	0	0	0	0	0	0	0	0	0	0	0	0	0	0	0	0
Aulacoseira distans var. nivaloides	0	0	0	0	0	0	0	0	0	0	0	0	0	0.41841	0	0	2.12766	0.921659	0	0	0	0	0.970874	33.1731	9.5	0	0	9.29204	0	0	0	0	0	0	0	0	0	0	0	0	0	0	0	0	0	0	0	0	0
Aulacoseira italica var. valida	0.487805	0	0.985222	0	0	0.492611	0.970874	0.990099	2.01613	0	0	0	0	0	0	0	0	0	0	0	0	0	0	0	0	0	0	0	0	0	3.39806	0.787402	0	0	0	0	0	0	0	0	0	0	0	0	0	0	0	0	0
Aulacoseira lirata	1.95122	1	19.7044	6.90789	6.76329	6.89655	5.33981	4.45545	0	1.46341	0	0	0	0	0	0.970874	2.55319	0	0	0.985222	0	0.392157	0	0	0	0	0	0	0.473934	0	1.94175	0.393701	0.847458	1.47783	0.47619	3.33333	6.31068	1.06383	2.87081	5.77778	6.39269	0	1.5	0	2.54237	2.42718	2.65487	0	0
Aulacoseira lirata var. alpigena	3.90244	7.5	9.85222	9.86842	12.5604	6.89655	8.25243	6.93069	0	1.46341	0.869565	2.1645	0	0	0	0	0	0.921659	0	3.94089	0	1.17647	0	0	0	0	0	0.442478	1.4218	0	1.45631	1.9685	0.847458	0.985222	3.33333	2.38095	6.79612	6.38298	2.39234	4	6.39269	2.89855	0	0	1.27119	1.94175	1.76991	0.483092	0.409836
Aulacoseira perglabra	0.487805	0	3.94089	10.8553	5.7971	5.41872	2.42718	0	0.806452	0	0.434783	0	0	0	0	0	0	0.460829	0.995025	0	0.440529	0.392157	0	0	0	0	0	0	0	0.78125	0	0	0	0.492611	0	0	0.970874	0.35461	2.39234	0	0	0	1.5	0	0.847458	0	1.32743	0	0
Aulacoseira subarctica agg.	0	0	0.492611	1.97368	0.483092	0	0	1.9802	6.85484	0	4.34783	1.2987	43.5644	9.62343	6.5	7.28155	25.9574	29.4931	30.3483	57.6355	8.81057	9.01961	14.5631	0	4.5	0	0.269542	4.42478	40.7583	24.6094	0	1.5748	0	0	0.47619	0.47619	1.45631	6.02837	3.34928	0.444444	0.913242	5.07246	3.5	0.306748	1.69492	0	0	0	1.63934
Aulacoseira sp.	0.487805	0.5	0	0.657895	0.483092	1.97044	1.45631	0	0.806452	0	0.434783	0.865801	0.990099	0	0.5	0.485437	1.2766	0	4.97512	0.492611	0	0	0.970874	1.44231	0.5	0	0	0.442478	0.947867	0	1.94175	0	0	0	0.47619	0	0	0.35461	0	0	0	1.08696	0	0	0	0	0	0	0.409836
Brachysira brebissonii fo. brebissonii	3.41463	3	1.47783	1.31579	1.44928	1.47783	0.970874	4.9505	9.27419	6.82927	10.4348	2.5974	0	2.51046	6	5.82524	3.40426	4.14747	3.9801	2.95567	7.04846	5.09804	3.8835	8.65385	10	1.37615	3.77358	3.9823	1.89573	0	3.8835	2.75591	1.69492	3.44828	1.42857	0.952381	0.485437	0.35461	0	0.444444	1.82648	1.44928	4.5	6.13497	3.38983	3.39806	3.09735	10.1449	3.68852
Brachysira styriaca	2.43902	1	0	0	0	0.492611	0.485437	0.49505	0	10.2439	3.91304	0	0	1.25523	0	0	0.425532	1.84332	2.98507	0.985222	1.76211	1.17647	2.91262	0.480769	1	0	0	8.84956	0	0	0	0	0.423729	1.97044	0	0	0	0	0	0.888889	0.456621	0.724638	2	1.53374	2.11864	0.485437	4.86726	0	3.68852
Brachysira vitrea	1.95122	5	0.492611	0.986842	0.966184	0.492611	2.91262	2.47525	2.01613	11.7073	18.6957	5.19481	0	2.92887	4	3.39806	2.12766	6.45161	6.46766	3.94089	7.48899	4.70588	6.31068	3.36538	9.5	0	2.15633	6.63717	1.89573	0.390625	2.91262	5.11811	3.81356	2.46305	1.42857	2.85714	3.39806	0.35461	0.956938	3.11111	1.36986	2.89855	4.5	7.97546	4.66102	2.91262	5.30973	6.28019	7.37705
(Cyclotella cf. glomerata)	0	0	0	0	0	0	0	0	0	0	0.434783	0	0	0	0	0.485437	0	0	0	0	0	0	0	0	0	84.4037	69.5418	0	0	7.42188	0	0	0	0	0	0	0	0	0	0	0	0	0	0	0	0	0	0	0
Cyclotella kuetzingiana (agg.)	0	0	0	0	0	0	0	0	0	0	0	9.52381	22.7723	42.6778	29	45.1456	8.51064	5.06912	0	0	12.7753	25.4902	26.699	9.13462	8.5	8.25688	10.7817	28.7611	38.3886	54.2969	0	1.1811	0	0.492611	0.952381	6.66667	1.45631	1.77305	1.91388	0	0.456621	0	0.5	0	0	0	1.32743	0.966184	0
Cyclotella stelligera	0	0	0	0	0	0	0	0	0	0.487805	3.04348	0.865801	0	0	0	0	0	0	0	0	0	0	0	0	0	0	0	0	0	0	0.970874	0	0	0	0	0	0	0	0	0	0	0	0	0	0	0	0.442478	0	0
Cymbella descripta	0.487805	0.5	0	0	0.483092	0	0	0	0.806452	1.46341	2.6087	1.2987	0	0.41841	0	0	0.425532	0.460829	0	0.985222	0	0.784314	0.485437	0	0	0	0.269542	2.21239	0	0	0.970874	0.393701	0	0	0	0	0	0.35461	0	0	0	0	0	0	0	0	0	0	0
Cymbella hebridica	1.46341	0.5	0	0.657895	0.966184	0.985222	0.485437	0.990099	0	0.97561	0	0.4329	0	0.83682	0.5	0	0.425532	0.460829	0.995025	1.47783	0.881057	1.17647	0.485437	0	1	0	0	0.884956	0	0	0.970874	0.393701	0.847458	0.985222	0	0	0	0	0	0	0	0.362319	0.5	0.920245	2.11864	0.485437	1.32743	0	2.86885
Cymbella lunata	1.46341	0.5	0	0	1.93237	0	1.45631	0.990099	0.806452	0.487805	0.869565	0.865801	0	0.83682	0.5	0.970874	1.2766	2.30415	0.995025	0.492611	3.96476	1.96078	0.970874	2.88462	1.5	0	0	0.884956	0.947867	0.390625	0.485437	1.9685	0.423729	1.47783	0.47619	0.47619	0.485437	0.70922	0.478469	0.444444	2.73973	2.53623	1	1.22699	2.11864	1.45631	2.21239	1.44928	2.45902
Cymbella perpusilla	0	0	0	0	0	0.492611	0	0.49505	0.403226	0.487805	0	0	0	0	1	1.45631	0.851064	0.460829	0.497512	0.985222	0.881057	2.35294	0	0	0	0	0	0	0	0	0.485437	0	0	0.985222	0	0.952381	0	0.35461	0.478469	0.444444	0.913242	0.724638	0.5	0.613497	0	0.485437	0	0.966184	0.409836
Cymbella sp.	0.97561	2	1.47783	0.986842	1.44928	0.985222	1.45631	0	0.806452	0.487805	0	0.4329	0.990099	0	1.5	1.45631	2.12766	0.460829	2.98507	0	0.440529	0	0.970874	0.961538	0.5	0.458716	1.34771	0.884956	0.473934	0	0	0	1.27119	0.985222	0.47619	0.952381	0	0.35461	0.478469	0.444444	0	2.53623	0	2.45399	0.423729	0.970874	0	4.83092	0
Eunotia curvata var. curvata	0	2	0.492611	0	0	0	0	0	0	1.46341	0.869565	0	0	0	0	0	0.851064	0	0.995025	0	0	0.392157	0	0	0.5	0	0	0.884956	0	0	0	1.9685	0.847458	1.97044	0.47619	0.47619	1.45631	1.06383	0.956938	0.888889	0.913242	0.362319	1	0	0.847458	0.970874	1.76991	0	2.04918
Eunotia curvata var. subarcuata	0	0	0	0	0	0	0	0	0	0	0	0	0	0	0	0.485437	0.425532	0.460829	0.995025	0.492611	1.32159	0.392157	0.970874	0.961538	3	1.37615	0.539084	0	0	0	0	0	0.847458	0.492611	0	0.952381	0	0.35461	0.478469	0	0	1.81159	0.5	3.37423	0	0	0	0	0.409836
Eunotia exigua	0	2	0	0	0	0.492611	0.485437	0.49505	4.83871	0	0.869565	0	0	0.83682	0	2.42718	0	1.38249	0.497512	0.492611	0.440529	0.392157	0	0.961538	0.5	0	0	0.884956	0	0	2.91262	1.1811	0.423729	0	0	0	0	0	0.478469	0	0	1.08696	0	0.306748	2.11864	0.970874	0	0.483092	1.63934
(Eunotia faba)	0	0	0	0	0	0	0	0	0	0.487805	0	0	0	0	0	0	0	0	0	0	0	0	0	0	0	0	0	0	0	0	0.485437	0	0	0	0	0	0	0.35461	0	0	0	0	0	0.613497	0	2.42718	0	0	0
Eunotia incisa	0.97561	0.5	0	0.328947	0	0	0	0.49505	0	0	0	0	0	0	0	0.485437	0	0.921659	1.99005	0.492611	0.440529	0.392157	0.970874	1.44231	1.5	0	0	0.442478	0	0	0.485437	1.1811	1.27119	1.47783	0.47619	0.47619	1.45631	0.35461	0	0.888889	1.82648	2.53623	2.5	4.90798	6.35593	4.36893	3.53982	2.89855	2.86885
Eunotia meisteri	0.97561	0	0	0	0	0	0	0	0	0.97561	0.869565	0	0	0	0.5	0	0	0	0	0	0	0	0	0.480769	0	0	0	0	0	0	0.485437	2.3622	2.54237	0	0.952381	0.952381	0	0	0.478469	0.444444	0.456621	0.362319	0	0.306748	0.423729	0.485437	0	0.483092	0
(Eunotia pect v minor)	0.487805	0	0	0	0	0.492611	0	0	0.403226	0	0.434783	0	0	0	0.5	0	0.425532	0	0	0.492611	0.440529	0	0	0	0	0	0	0	0	0.390625	0	1.1811	0	0.492611	0	0	1.45631	0	1.43541	0	1.36986	0	0	0.306748	0.847458	0	2.21239	0	1.22951
Eunotia sp. 10 (minima)	0.97561	0	0	0	1.93237	0.492611	0	2.47525	22.5806	0.487805	0	0	0	0	0.5	0	0	0.921659	0.995025	0.985222	0.440529	0	0	0	1	0	0.539084	0.442478	0	0	1.94175	0	1.27119	0.985222	0.47619	0	0.485437	0.35461	0	0	0.913242	1.08696	0.5	0.920245	0	0.970874	0	1.44928	0
Eunotia tenella	0.487805	0.5	0	0	0	0	0	0.990099	0	0	0	0	0	0	0	0	0	0	0.497512	0	0	0	0	0	0	0	0	0.442478	0	0	0	0	0.847458	0.492611	0.47619	1.42857	0	0.70922	1.43541	0.888889	0.456621	2.17391	2	0.920245	0	3.39806	0.442478	0.966184	3.27869
Eunotia sp.	2.43902	1.5	0.492611	0.657895	0.483092	0	0	0	0.403226	0.97561	0.869565	0.865801	0.49505	0.83682	1	0.970874	0	0.921659	1.99005	0.492611	0.881057	1.17647	1.45631	2.40385	0.5	0	1.34771	0	0	0	1.45631	0.787402	3.38983	1.97044	1.42857	0.47619	0	1.41844	1.91388	1.77778	0.913242	2.53623	2	5.21472	1.27119	8.25243	0.884956	4.34783	0.819672
Fragilaria construens var. venter	2.43902	0.5	0.492611	0	1.44928	0.492611	0	0	0	0.487805	0	1.2987	0.49505	0	0	0	0	0	0	0	0	0	0	0	0	0	0	0	0	0	7.28155	5.90551	0	2.95567	12.381	7.61905	7.28155	9.21986	4.30622	2.22222	4.56621	0	0	0	1.27119	0	0	0	0
Fragilaria elliptica	0	0	0	0	0	0	0.485437	0	0	0	0	12.987	0	0	0	0	0	0	0	0	0	0	0	0	0	0	0	0	0	0	0	0	0	0	0	0	0	0	0	0	0	0	0	0	0	0	0	0	0
Fragilaria lata	1.46341	0.5	1.97044	4.93421	2.89855	0.985222	0	0	0	0	0	0	0	0	0	0.485437	0	0.460829	0	0.492611	0	0	0	0	0.5	0	0	0	0	0	0	2.3622	2.11864	0	0.47619	0	0	0.35461	0.478469	0.888889	1.36986	0	0.5	0.306748	0.847458	0.970874	0.442478	0	0
Fragilaria pinnata	0.487805	0	0.492611	0.657895	0	0	0.970874	0	0	0	0	0	0	0	0	0	0	0	0	0	0	0	0	0	0	0	0	0	0	0	0.485437	0	0	0	0	0	0.485437	0.70922	0.478469	0.888889	0.913242	3.62319	0	0.306748	0	0	0	0	0
Fragilaria vaucheriae	0	0	0	0	0	0	0	0	0	0	0	0	0	2.09205	0	0	0	0	0.497512	0	0	0.392157	0	0	0	0	0	0	0	0	0.970874	3.14961	0.847458	10.3448	2.38095	4.28571	1.45631	1.06383	1.43541	0.444444	0	4.34783	2	1.53374	0	4.85437	0.884956	1.44928	0.409836
Fragilaria virescens var. exigua	13.1707	0	2.46305	2.96053	5.31401	0	0.485437	3.46535	0.403226	2.92683	0	3.8961	3.9604	0.83682	0	0	0.851064	0.460829	0.995025	0	2.64317	1.56863	0.970874	0	1	0	0	1.76991	0.473934	0.390625	19.4175	13.7795	8.47458	1.47783	10.4762	2.38095	1.94175	0	0.956938	1.77778	1.36986	0.362319	0.5	0	0.847458	0	1.32743	1.44928	1.22951
(Fragilaria sp.)	0.487805	2	4.92611	2.30263	2.41546	0	3.39806	0.49505	0.806452	0	0	0	0	0.41841	0	0	0	0	0	0	0.440529	0	0	0	0	0	0	0	0	0	5.33981	0	2.9661	0	1.90476	0	2.42718	4.25532	0	0	0	1.81159	0	0.920245	0	0	0	0	0
Frustulia rhomboides var. rhomboides	2.43902	4	1.97044	0	0.966184	3.94089	0.970874	2.47525	0.806452	0.487805	0	0	0.49505	1.25523	3	3.39806	1.70213	2.30415	0.497512	0.492611	0.440529	1.17647	3.8835	0	1.5	0	0.808625	0	0	0	0.970874	1.1811	0	0.985222	0	0	0.970874	0	0.956938	0.888889	1.36986	0.724638	5	3.68098	5.9322	1.94175	4.42478	3.86473	1.63934
Frustulia rhomboides var. saxonica	5.36585	7	1.97044	1.97368	4.83092	8.867	6.79612	5.94059	6.85484	5.36585	4.78261	1.2987	2.9703	10.0418	19.5	11.165	9.3617	9.21659	9.95025	7.38916	14.5374	10.1961	5.33981	12.5	18	0.458716	2.15633	5.75221	0.947867	0.390625	2.42718	5.90551	3.81356	3.94089	1.42857	1.42857	0.485437	0.70922	0	0	1.36986	3.26087	10	11.9632	17.3729	2.42718	17.6991	9.17874	18.0328
Frustulia rhomboides var. viridula	0	0.5	0	0.328947	1.93237	0	1.94175	0.49505	0.806452	0	0	0	0.49505	0	0.5	0	2.12766	0	0	0	0	0	0	0	0	0	0	0	0	0	0	0	1.27119	0	0.952381	0.47619	0	0.35461	0	0	0	0.362319	0	0.920245	0	0.485437	0	0.483092	0
Gomphonema angustatum	0	1.5	0.492611	0	0	0	0	0	0	0	0	0	0	0	0	0	0	0	0	0	0	0	0	0	0	0	0	0.442478	0	0	0	0.787402	1.69492	0.985222	2.38095	2.85714	1.45631	0.70922	1.91388	3.55556	3.19635	1.08696	0	0.306748	0.847458	0.485437	0	0.483092	0
Melosira arentii	0	0	0	0	0	1.47783	0	1.9802	0	5.85366	0	0	0	0	0	0	0	0	0	0	1.32159	0.784314	0	0	0	0	0	0	0	0	0	0	0	0	0	0	0	0	0	0	0	0	0	0	0.423729	0	0	0	0
Meridion circulare	0	0	0	0	0	0	0	0	0	0	0	0	0	0	0	0	0	0	0	0	0	0	0	0	0	0	0	0	0	0	0	0	0	1.47783	0.952381	1.42857	0.970874	0.70922	4.30622	1.33333	0	1.08696	0	0	0	0	0	0.483092	0
(Navicula [cf. schmassmannii mini])	0	0	0.985222	4.60526	3.86473	3.94089	3.8835	0	0	0	0	0	0	0.41841	0	0	0	0	0	0	0	0	0.485437	0	0	0	0	0	0	0	0	0	0	0.492611	0	0.952381	2.42718	0	1.43541	0.444444	0.913242	0.362319	0	0	0	0.970874	0	0	0
Navicula arvensis	0	1.5	5.41872	12.5	8.21256	7.88177	1.94175	0	0.403226	0	0	0	0	0	0	0	0	0	0	0	0	0	0	0	0	0	0	0	0	0	0	0.393701	0.847458	0.492611	1.90476	0.952381	2.91262	1.41844	6.2201	3.55556	5.02283	1.44928	2.5	0	0	0	0	0.483092	0.409836
Navicula cumbriensis	0	1.5	0.492611	0	0.966184	0	0.970874	0	0.403226	0	0.434783	0.4329	0.49505	0.41841	1.5	0	1.70213	1.84332	1.99005	2.46305	0	0	0	0	0.5	0.458716	0.539084	0.442478	0.473934	0	0	0.787402	0	0.985222	0	1.42857	0.485437	0.70922	0	0.888889	0	0.724638	0.5	1.22699	0.847458	1.94175	0.442478	3.86473	1.22951
(Navicula disjuncta)	0	0	0.492611	1.31579	1.44928	2.46305	2.42718	0.990099	1.6129	0.97561	0	0	0	0	0	0	0	0	0	0	0	0	0	0	0	0	0	0	0	0	1.94175	0	0	0	0	0	0.485437	0	0.478469	0	0.913242	0	0.5	0	0	0	0	0	0
Navicula hoefleri	2.92683	1	0	0	0.966184	0.492611	0	0.49505	0	0	0	0	0	0.83682	2	0.970874	0	0	0.497512	0	1.76211	0	0	0.480769	2	0.917431	0	0	0	0	0	0	2.11864	0.985222	1.42857	0	0	0	0	0.888889	0	1.44928	0	1.53374	0	0	1.32743	0	0.819672
(Navicula impleximormis)	0	0	2.46305	1.31579	0.966184	0	0.970874	1.48515	0	0	0	0	0	0	0.5	0	0	0	0	0	0.440529	0.392157	0	0	0	0	0	0	0	0	0	0.393701	0	0	2.38095	0.47619	1.45631	1.06383	0.956938	1.33333	0.456621	2.17391	0.5	0	0	0	0.884956	0	0
Navicula jaernefeltii	0	0	4.4335	0	0.483092	1.97044	0	0.990099	0	0.487805	0	0	0	0	0	0	0	0	0	0	0	0	0	0	0	0	0	0	0	0	0	0	0	0	0	0	0	0	0	0	0	0	0	0	0	0	0	0	0
Navicula leptostriata	2.92683	3.5	1.47783	0.328947	1.44928	3.94089	0.485437	3.46535	1.6129	1.46341	1.30435	0.4329	0.49505	2.51046	2	1.94175	2.12766	1.84332	0.995025	1.47783	2.64317	1.96078	3.39806	2.88462	1.5	0.917431	0.539084	2.21239	0.947867	0.78125	0.485437	2.75591	5.50847	3.44828	1.42857	1.42857	0.970874	1.06383	1.91388	4.44444	2.28311	3.62319	5.5	3.98773	1.69492	4.36893	5.75221	6.76329	4.09836
Navicula mediocris	1.46341	4	2.46305	0.657895	0.966184	1.47783	1.45631	2.47525	0.403226	0	0.434783	1.2987	0	0	1.5	0	1.2766	0.921659	0.497512	0.492611	0.440529	0.784314	0	0	0.5	0.458716	0.269542	0.884956	0	0	0.485437	1.1811	0.847458	0.985222	1.90476	0.47619	1.45631	1.06383	1.43541	0.444444	0.913242	2.53623	1	1.53374	3.38983	0	1.76991	2.41546	0
Navicula minima var. minima	0	0	0	0	0	0	0	0	0	0	0	3.4632	0	0	0	0	0.425532	0	0	0	0	0	0	0	0	0	0	0	0	0	0.485437	0.393701	0	0.985222	0	4.7619	1.45631	0	3.82775	1.33333	0	0	0.5	0	0	0	0	0	0.409836
Navicula pupula var. pupula	0.97561	2.5	1.47783	1.64474	2.89855	1.47783	3.39806	3.9604	0.403226	2.92683	2.17391	0.865801	0	0	0	0	0	0	0	0	0.440529	0.392157	0	0	0	0	0	0	0	0	0	1.5748	0.423729	0.985222	0.47619	0	0	0	0	0.444444	0.456621	0	0.5	0	0.423729	0	0.442478	1.44928	0
Navicula seminuloides	0	0	0	0	0	0	0	0	0	0	0	0	0	0	0	0.485437	0	0	0	0	0	0	0	0	0	0	0	0	0	0	0	0	0	1.47783	0	0	1.45631	0	0.478469	7.11111	2.73973	0	1.5	0	0.423729	0	0	0	0.409836
Navicula seminulum	0	0	4.4335	1.64474	0	0.985222	1.45631	0.990099	0.403226	0	0	2.1645	0	0	0	0	0	0	0	0	0	0	0	0	0	0	0	0	0	0.390625	0.485437	0.393701	3.81356	0	1.42857	0.952381	0	1.06383	0.478469	1.33333	0	0.724638	1.5	0.306748	0	0	0	0	0
(Navicula sp.)	3.41463	2.5	4.92611	1.64474	0	0.985222	0.970874	1.9802	2.01613	0.487805	0.434783	0.865801	0	0	2	0	0.425532	1.38249	0	0.985222	0.440529	0	0.485437	0	0.5	0	0	0	0	0	0.970874	0	0	0.985222	0.47619	0.47619	0.485437	0.35461	0	1.33333	1.36986	0.724638	0	0	0.423729	0.485437	0	0.966184	0
Neidium affine var. affine	0.487805	2.5	0.492611	0	0.483092	0.985222	1.45631	1.9802	0.806452	0.487805	3.04348	0.4329	0	0.41841	0.5	0.970874	0.851064	0	0.995025	0.492611	1.32159	0.392157	0	0.961538	1	0	0	0.442478	0	0.390625	0.970874	0.393701	1.27119	0.985222	0.952381	0.47619	0.485437	1.06383	0	0	0	0	1.5	2.14724	1.27119	1.45631	1.76991	0.483092	2.45902
Neidium sp.	0	0	0.985222	0.657895	0	0	0	0	0	0	0	0	0	0	0	0	0	0	0	0	0	0	0	0	0	0	0	0	0	0	0	0	0	0	0	0	0	0	0	0	0	0.362319	0	0.306748	0	0.485437	0	0	0
Nitzschia gracilis	0.487805	1	0	0	0	2.46305	0	0.990099	1.6129	0.97561	0.434783	0	0	0	0.5	0.485437	0	0	0	0	0.440529	1.56863	0.970874	0	0.5	0	0.269542	0	0.473934	0	1.45631	0.393701	1.27119	0.492611	2.38095	0	0.970874	1.41844	0.478469	0	0	0.724638	0.5	0.920245	0	0.970874	0	0.483092	0.409836
Nitzschia perminuta	0.487805	0	0	0.328947	0	0	0.485437	0.990099	0.806452	0	1.30435	0	1.48515	0	0	0	0	0.460829	0	0.492611	2.20264	1.56863	0.485437	0.480769	1	0	0	0.884956	0	0.390625	0	1.1811	7.62712	1.97044	1.42857	2.85714	1.94175	1.06383	2.87081	1.77778	1.36986	1.08696	2.5	1.22699	0.423729	2.42718	0.442478	0.966184	2.45902
Pinnularia abaujensis	0.97561	1.5	1.47783	1.31579	0.483092	0	0.485437	1.48515	0.806452	2.43902	4.34783	0	0	0	0	0	0	0.921659	0	0	0	0	0	0	0	0	0.269542	0	0	0	0.485437	0.787402	2.11864	0.492611	0.47619	0	0	0.35461	0	0.444444	0	0.362319	1	1.22699	0	0	0.884956	0.483092	0
Pinnularia biceps	3.90244	1	1.97044	1.64474	4.83092	2.95567	11.6505	7.92079	4.43548	2.43902	2.17391	0.865801	0.49505	0	0.5	0	0.425532	0.921659	0	0	1.32159	2.35294	0	0	0.5	0	0.269542	0.442478	0	0.390625	2.42718	0.393701	0	3.94089	0.47619	1.42857	0	0	0	0.888889	0	2.17391	3	1.84049	4.66102	3.39806	5.30973	0.966184	2.45902
(Pinnularia brauni)	0	0	0	0	0	1.97044	0	4.45545	0	0	0.434783	0	0	0	0	0	0	0	0	0	0	0	0	0	0	0	0	0	0	0	0	0	0	0	0	0	0	0	0	0	0	0	0	0	0	0	0	0	0
Pinnularia sp.	2.43902	6	0.985222	1.97368	3.86473	5.91133	12.6214	6.93069	4.03226	2.43902	2.17391	1.2987	1.9802	0	1.5	0.485437	0.851064	1.38249	1.49254	1.47783	2.64317	0.392157	1.94175	0	0.5	0	0.539084	0.442478	0	0	0.485437	1.1811	1.69492	1.47783	0.952381	2.38095	0	0	0.956938	0	1.36986	1.08696	1	4.29448	1.27119	2.91262	0.442478	0.966184	1.63934
Stauroneis anceps fo. gracilis	0	0	0	0	0	2.46305	0	0	0	0	0	0	0	0	0	0	0	0	0	0	0	0	0	0	0	0	0	0	0	0	0	0.393701	0	0.985222	0	0	0	0	0	0	0	0	0	0	0	0	0	0	0
Stauroneis anceps var. anceps	0	0	0	1.64474	0	0	0	0	2.01613	1.95122	1.30435	0.4329	0	0.41841	0	0	0	0	0	0	0.440529	0	0.970874	0	0	0	0	0	0	0	0.485437	0.393701	0	0.985222	0	0	0.485437	0.35461	0	0.444444	0	0	1	0.613497	0.847458	0	0.442478	0.966184	0
(Stauroneis sp.)	0.487805	1	0.985222	0	0	0	0	0.49505	0	0	0	0.4329	0	0	0	0	0	0	0	0	0	0	0	0.480769	0.5	0	0	0	0	0	0	0	0	0	0	0	0	0	0.478469	0	0	0	0	0.306748	0.423729	0.485437	0	2.41546	2.04918
Tabellaria binalis	0	0	0	0	0	0	0	0	0	0	0	0	0.49505	2.09205	0.5	0	0.425532	0	0	0	0	0	0	0	0	0	0	0	0	0	0	0	0	0	0	0	0	0	0	0	0	0	0	0	0	0	0	0	0
Tabellaria flocculosa agg.	0	1.5	0.492611	0.328947	0	0.492611	0.485437	0	0.806452	0.487805	0.869565	0.865801	0	1.67364	0.5	0	0.851064	0.460829	1.49254	0.492611	0.440529	1.56863	1.94175	0	2	0.458716	0	2.21239	0.947867	0	1.45631	3.93701	1.27119	6.89655	0.47619	0.952381	0.970874	0.70922	3.34928	1.77778	1.36986	1.44928	0.5	2.14724	3.38983	2.42718	2.21239	3.38164	2.45902
Tabellaria flocculosa var. flocculosa	0.487805	1	0.492611	0	0	0.492611	0	0	0.403226	0	0.434783	0	0	0	0.5	0	5.95745	7.8341	2.98507	0.492611	5.72687	7.05882	3.39806	9.13462	2	0	0	0.442478	0	0	0	1.5748	1.69492	0.492611	3.33333	0.952381	1.45631	3.5461	3.82775	3.11111	0.913242	2.17391	1	0.920245	1.27119	0.970874	0.884956	0	0.819672
(Tabellaria sp.)	0	0	0	0	0	0	0	0	0	0	0	2.5974	0.49505	0	0	0	0	0	0	0	0	0	0	0	0	0	0	0	0	0	0	0	0	0	0	0	0	0	0	0	0	0	0	0	0	0	0	0	0
Indeterminata	2.43902	3	3.94089	0	2.41546	2.46305	0.485437	0	0.403226	1.46341	1.30435	2.5974	0.49505	0	0	0	0	0	0	0	0	1.56863	0.970874	0	0	0	0.269542	0	1.89573	0	0.970874	0.787402	0	0	0.47619	2.38095	0.970874	8.15603	2.87081	3.11111	0	0	1	3.06748	0.847458	3.39806	0.884956	1.93237	0
sp.ec < 2%	11.7073	10.5	1.47783	3.28947	5.7971	3.44828	6.79612	10.396	9.67742	9.26829	10	10.3896	7.92079	3.34728	8	5.33981	9.78723	8.29493	11.9403	3.94089	7.04846	5.09804	10.1942	3.36538	10.5	0.458716	2.69542	4.86726	3.31754	5.07812	6.31068	12.2047	5.50847	10.3448	7.14286	13.3333	14.0777	7.44681	12.9187	11.5556	6.39269	12.3188	18	7.36196	10.1695	10.1942	10.177	9.17874	13.1148
Countsum	205	200	203	304	207	203	206	202	248	205	230	231	202	239	200	206	235	217	201	203	227	255	206	208	200	218	371	226	211	256	206	254	236	203	210	210	206	282	209	225	219	276	200	326	236	206	226	207	244
[truncated: 3 more columns]

## Sheet: PCA loadings
Element	PC1	PC2	PC3	PC4	lake
Al	-0.19645	0.859643	0.137689	0.265093	kramp
Ca	0.864449	-0.0282436	0.320318	-0.256733	kramp
Fe	0.087031	0.842402	-0.0317991	0.330139	kramp
K	0.971839	-0.030375	0.0188336	-0.0192812	kramp
Mg	0.59152	0.666272	0.00802991	0.303452	kramp
Na	0.855069	0.108867	-0.103226	0.225624	kramp
S	0.697468	0.493152	0.24859	0.069223	kramp
Si	-0.33292	-0.437993	-0.724159	-0.0707214	kramp
P	-0.317585	0.473221	0.149716	0.671321	kramp
Ti	0.904534	-0.231219	0.236385	0.0756379	kramp
V	-0.0186829	0.359802	0.0722697	0.72841	kramp
Mn	0.383112	0.858025	0.17968	0.188752	kramp
Zn	0.856953	0.174095	0.297794	-0.163631	kramp
Br	0.0289968	-0.266305	0.815455	0.30627	kramp
Sr	0.179842	0.0140622	0.533903	0.736394	kramp
Ba	0.352883	-0.733963	0.288926	0.175968	kramp
Pb	0.740568	-0.382947	0.414357	-0.293442	kramp
LOI	0.553822	0.260669	0.699126	0.106597	kramp
Al	-0.33191	0.711329	0.343269	0.340533	mosjo
Ca	0.240587	0.649234	0.31789	0.393325	mosjo
Fe	-0.281825	0.569849	0.236995	0.640598	mosjo
K	0.940158	-0.144852	-0.215998	-0.175341	mosjo
Mg	0.920297	0.0654495	-0.249058	0.133122	mosjo
Na	0.901174	-0.198998	-0.263722	-0.124943	mosjo
S	-0.347635	0.686866	0.253646	0.417482	mosjo
Si	0.15053	-0.219487	-0.874418	-0.0114798	mosjo
P	-0.498743	0.62156	0.172944	0.196504	mosjo
Ti	0.936927	-0.20583	0.0694526	-0.136252	mosjo
V	0.0402543	0.281931	0.826385	0.310931	mosjo
Mn	0.191222	0.773982	0.152449	0.495119	mosjo
Cu	-0.214646	0.892503	0.12113	-0.25621	mosjo
Zn	0.689057	0.221896	0.164852	0.25619	mosjo
Br	-0.134279	0.292424	0.658395	0.479394	mosjo
Sr	-0.137265	0.345705	0.253547	0.872689	mosjo
Zr	0.919772	-0.231259	-0.105909	0.0761606	mosjo
Ba	0.127081	0.0200619	0.108039	0.95044	mosjo
Pb	0.947382	-0.161036	-0.147716	-0.0958376	mosjo
LOI	-0.302218	0.0776688	0.87936	0.101431	mosjo
Al	0.574495	-0.179894	0.573656	0.50687	fick
Ca	-0.315804	-0.406996	0.641863	0.370434	fick
Fe	0.356399	0.881617	-0.0662284	0.0735143	fick
K	0.937244	0.323989	-0.00862002	-0.00784029	fick
Mg	0.88727	0.370736	0.13862	0.0772344	fick
Na	0.959438	0.182488	0.0475327	-0.0508136	fick
Si	-0.10723	-0.579171	-0.244472	-0.505542	fick
P	-0.0169369	0.762719	0.17137	0.48301	fick
Ti	0.918237	0.250336	0.0803855	-0.0947138	fick
V	-0.305859	-0.135483	0.802096	-0.0400639	fick
Mn	0.260944	0.907606	-0.0827859	-0.178277	fick
Cu	-0.180533	0.208539	0.237235	0.841535	fick
Zn	0.494876	0.74624	-0.180565	0.26456	fick
Br	-0.762224	-0.43228	0.349263	-0.0345046	fick
Sr	0.55595	0.0925183	0.774404	0.197189	fick
Ba	0.0802292	0.10002	0.897374	0.244181	fick
Pb	0.48686	0.737842	-0.30904	0.0873654	fick
LOI	-0.907494	-0.0983517	0.184845	0.109734	fick
